1 Title:

2 Recruitment orders underlying binocular coordination of eye position and velocity in the  
3 larval zebrafish hindbrain

4

5 Authors:

6 Christian Brysch <sup>1,2</sup>, Claire Leyden <sup>1,2</sup>, Aristides B. Arrenberg <sup>1,\*</sup>

7

8 Affiliations:

9 <sup>1</sup> Werner Reichardt Centre for Integrative Neuroscience and Institute for Neurobiology,  
10 University of Tübingen, 72076 Tübingen, Germany; <sup>2</sup> Graduate Training Centre of  
11 Neuroscience, University of Tübingen, 72074 Tübingen, Germany; \* Lead contact

12

13 Correspondence:

14 Correspondence should be addressed to A.B.A ([aristides.arrenberg@uni-tuebingen.de](mailto:aristides.arrenberg@uni-tuebingen.de))

15

16 Keywords:

17 Oculomotor mechanics, hindbrain, vertebrate, binocular, velocity, neural integrator, motor,  
18 calcium imaging

19

20

21

22

23

24 **Abstract:**

25 **Background:**

26 The oculomotor integrator (OI) in the vertebrate hindbrain transforms eye velocity input into  
27 persistent position coding output, which plays a crucial role in retinal image stability. For a  
28 mechanistic understanding of the integrator function and eye position control, knowledge  
29 about the tuning of the OI and other oculomotor nuclei is needed. Zebrafish are increasingly  
30 used to study integrator function and sensorimotor circuits, yet the precise neuronal tuning  
31 to motor variables remains uncharacterized.

32

33 **Results:**

34 Here, we recorded cellular calcium signals while evoking monocular and binocular optokinetic  
35 eye movements at different slow-phase eye velocities. Our analysis reveals the anatomical  
36 distributions of motoneurons and internuclear neurons in the nucleus abducens as well as  
37 those of oculomotor neurons in caudally adjacent hindbrain volumes. Each neuron is tuned  
38 to eye position and/or velocity to variable extents and is only activated after surpassing  
39 particular eye position and velocity thresholds. While the abducens (rhombomeres 5/6)  
40 mainly codes for eye position, in rhombomeres 7/8 a velocity-to-position coding gradient  
41 exists along the rostro-caudal axis, which likely corresponds to the velocity and position  
42 storage mechanisms. Position encoding neurons are recruited at eye position thresholds  
43 distributed across the behavioral dynamic range, while velocity encoding neurons have more  
44 centered firing thresholds for velocity. In the abducens, neurons coding exclusively for one  
45 eye intermingle with neurons coding for both eyes. Many of these binocular neurons are  
46 preferentially active during conjugate eye movements, which represents a functional  
47 diversification in the final common motor pathway.

48 **Conclusions:**

49 We localized and functionally characterized the repertoire of oculomotor neurons in the  
50 zebrafish hindbrain. Our findings provide evidence for a mixed but task-specific binocular  
51 code and suggest that generation of persistent activity is organized along the rostro-caudal  
52 axis in the hindbrain.

53

54

55

56

57

58

59

60

61

62

63

64

65

66

67

68

69 **Background:**

70

71 The oculomotor system is responsible for moving the eyes in vertebrates and is highly  
72 conserved across species. Zebrafish are increasingly used to improve our understanding of  
73 the oculomotor population code and eye movement control [1]–[6].

74 The oculomotor system for horizontal eye movements consists of multiple elements (Fig. 1a).

75 It is responsible for generating and maintaining stable eye positions as well as eye movements  
76 during saccades, optokinetic and vestibulo-ocular reflexes (OKR, VOR), and other behaviours.

77 The lateral and medial rectus (LR, MR), which represent the extraocular eye muscles  
78 responsible for horizontal eye movements, are controlled by motoneurons (MN) in the  
79 nucleus abducens (ABN) and the oculomotor nucleus (OMN), respectively. The OMN MNs are  
80 activated by internuclear neurons (INN) residing in the contralateral ABN. The ABN receives  
81 input from a range of structures such as the burst (B) system for driving saccades, the  
82 horizontal eye velocity-to-position neural integrator (termed oculomotor integrator, OI) for  
83 maintaining eye positions (P), and the velocity storage mechanism (VSM) associated with slow  
84 eye velocities (V) during optokinetic and vestibular responses.

85 The oculomotor integrator is of particular interest, as its persistent firing and dynamic  
86 integration of inputs manifest a short-term memory of eye position. It mathematically  
87 integrates eye velocity inputs in order to generate a neural representation of eye position via  
88 persistent firing [7], [8]. Its mechanisms of operation [9]–[11] are not fully understood and  
89 could provide insights into memory functions of other, higher, brain areas as well. The OI  
90 neurons in zebrafish are functionally heterogeneous and their differential function is likely  
91 related to the mechanism of integration. The zebrafish OI is located in hindbrain

92 rhombomeres 7 and 8 and is organized internally along both the rostro-caudal and dorsal-  
93 ventral axes, resulting in a gradient of neuronal persistence times [12]. Neurotransmitter  
94 identities as well as axonal projection patterns have been characterized previously ([13]–  
95 [15]). In theoretical models of integration mechanisms [9]–[11], [16], [17], the existing  
96 recruitment order of integrator neurons is crucial: each neuron carries an eye position  
97 threshold and once surpassed, the firing rate is linearly related to the eye position in the ON  
98 direction [18]–[20].

99 In the cat and primate brain, the OI is located in two nuclei, the nucleus prepositus hypoglossi  
100 (NPH) and the medial vestibular nucleus (MVN). It contains position coding neurons, which in  
101 addition encode saccadic eye velocity to variable extents ([19], [20]). In the goldfish OI  
102 (termed Area I in goldfish) position neurons typically also encode saccadic velocity [18].

103 The velocity storage mechanism is a second short-term memory system in the oculomotor  
104 hindbrain, which is charged by vestibular or optic flow stimulation via vestibular nuclei and  
105 the pretectum/accessory optic system. It supports retinal and global image stabilization and  
106 maintains the eye velocity for a certain time after cessation of stimulus movement in an after-  
107 response. While the monkey NPH has been reported to encode eye/head velocity during  
108 vestibular stimulation [19] as well, in goldfish such head velocity signals are restricted to an  
109 anatomical region termed Area II, which is located rostral to the OI [21]–[23]. The low-velocity  
110 encoding neurons have not been functionally identified in zebrafish yet [but see anatomical  
111 regions in [2], [22]]. Zebrafish readily generate slow-phase optokinetic reposes and therefore  
112 velocity encoding neurons are needed. However, the VSM is still immature in developing  
113 larvae: velocity is only stored for very brief periods of time – if at all [24], [25].

114 In summary, the differential eye position and velocity tuning of zebrafish hindbrain neurons  
115 is still elusive but crucial for understanding the functional architecture of the OI and other  
116 oculomotor nuclei. Here, we employ stimulus protocols designed to measure eye position and  
117 eye velocity encoding independently and reveal an anatomical velocity-to-position gradient  
118 in rhombomeres 7 and 8 as well as recruitment orders for eye position and eye velocity during  
119 the slow phase of the OKR.

120 In addition to the position/velocity tuning, we characterize the ocular tuning in this study.  
121 Since vertebrates possess two eyes, the drive for each eye needs to be binocularly  
122 coordinated to facilitate stable perception of the whole visual field. This binocular  
123 coordination is a readily observable feature in human and zebrafish oculomotor behaviour:  
124 most of the time both eyes move in the same direction with the same amplitude. Historically,  
125 two different mechanism have been suggested: The two eyes could receive conjugate  
126 commands to move together “as two horses on the one rein” (Hering’s hypothesis), or each  
127 eye could be controlled independently so that binocular coordination would need to be  
128 learned (Helmholtz’ hypothesis, [26], [27]). It remains uncertain how binocular coordination  
129 is implemented, with the likelihood that a full explanation contains elements of both theories  
130 [28], [29]. Here, we employ monocular and binocular stimulation protocols to drive conjugate  
131 and monocular eye movements while measuring neuronal activity. We present evidence for  
132 a mixed mono-/binocular code in the hindbrain. Within the abducens nucleus different  
133 neurons are recruited preferentially during binocular versus monocular optokinetic  
134 responses, which represents a deviation from a strict final common motor pathway.

135

136

137 **Results:**

138

139 **Zebrafish hindbrain neurons group into distinct mono- and binocular clusters**

140 To localize and functionally characterize hindbrain neurons active during oculomotor  
141 behaviour, we stimulated larvae with patterns of moving gratings to elicit optokinetic  
142 responses while measuring GCaMP6f calcium signals in individual neurons (Fig. 1a-b).

143 Zebrafish show a high degree of binocular coordination: most of the time, the eyes are moved  
144 in a conjugate fashion with the notable exception of convergence during prey capture and  
145 spontaneous monocular saccades [[30], own observations]. In order to assess the binocular  
146 coordination within the oculomotor system and to identify the location of internuclear  
147 neurons (INNs) and other structures, we applied a stimulus protocol geared to decouple both  
148 eyes and reduce the gain of the non-stimulated eye to  $<0.1$  by showing a moving grating to  
149 the stimulated and a stable grating to the non-stimulated eye [24]. This enabled us to classify  
150 neurons according to their innervated eye(s) based on their response profile. The stimulus  
151 consisted of stimuli driving primarily monocular and conjugate eye movements, respectively.  
152 The large decorrelation of left and right eye movements enabled us to classify the monocular  
153 or binocular coding of each neuron (Fig. 2a-b'). For the characterization of neuronal response  
154 types, we calculated the correlation of neural activity traces with each of 52 regressors  
155 formed to identify neurons primarily coding for different directions, eye muscles, eye position  
156 or OKR slow-phase eye velocity (Supplemental Fig. 1a-a'). We found that eye-correlated  
157 neurons are virtually always active during clockwise or counter-clockwise binocular  
158 stimulation (2380 out of 2508 neurons, from 15 larvae with each recording depth sampled 8-  
159 fold). They only differ from each other with regard to the extent of recruitment during  
160 monocular eye movements (Fig. 4c, Supplemental Fig. 1e).

161 We identified four primary response types in our hindbrain data: two monocular (M) types  
162 with activity for either the left or the right eye (LE, RE), which were also active during the  
163 binocular stimulus phase (MLE, MRE, Fig. 2a', Fig. 3a-b, Supplemental Fig. 3a-b), and two  
164 binocular response types. The binocular response types (types BA and BP, Fig. 2b-b' and Fig.  
165 3c-d) were either always active ('binocular always', BA, Fig. 2b), or showed a preference  
166 towards binocular eye movements ('binocular preferred', BP, Fig. 2b').  
167 Since the motor range for eye movements during the binocular stimulation phase was mostly  
168 larger than during the monocular phases, we excluded all neurons that did not reach their  
169 firing threshold during the monocular phase (Supplemental Fig. 2).  
170 98 % of eye movement correlated neurons, caudal to the Mauthner cells, responded in an  
171 ipsiversive manner (2110 vs. 37), though this hemispheric restriction was less prominent  
172 rostral to the Mauthner cells (65%, 228 vs. 133). Eye movement correlated neurons on the  
173 right side of the hindbrain are increasingly active during rightward eye positions (of the left  
174 and/or right eye) and vice versa.

175

## 176 **Monocular neurons**

177 Monocular position encoding neurons are primarily located in rhombomeres 5 and 6 – based  
178 on mapping performed using the HGj4a line [31] –, forming two distinct columns in each  
179 rhombomere (Fig. 3a; Supplemental Fig. 3a). A second cluster can be seen around 150  $\mu$ m  
180 caudal to the Mauthner cells and 40  $\mu$ m lateral to the medial longitudinal fasciculus (MLF).  
181 This region in rhombomere 7/8 partially overlaps with the areas previously described as the  
182 OI in zebrafish [12]–[14], extending caudal-ventrally into the inferior olive (IO) which we find  
183 is mostly monocular encoding. The putative OI region contains a high number of position  
184 neurons encoding the contralateral eye and only few neurons encoding the ipsilateral eye.



185 Within our imaged brain volume containing rhombomeres 5 and 6 position neurons coding  
186 for the ipsilateral eye span only a narrow band 30 to 70  $\mu\text{m}$  ventral to the MLF. Based upon  
187 the wiring diagram (Fig. 1a) and their response profile (ipsilateral, ipsiversive, position  
188 coding), these neurons located in the ABN correspond to motoneurons innervating the lateral  
189 rectus. Internuclear neurons carrying the information used to innervate the medial rectus  
190 should be located on the contralateral side and respond to contraversive positions. Such  
191 putative INNs are abundant and located more medially and dorsally than motoneurons,  
192 spanning a wider range from 60  $\mu\text{m}$  ventral to around 30  $\mu\text{m}$  dorsal to the MLF. These two  
193 clusters of putative moto- and INNs in the ABN are mirror-symmetrical between monocular  
194 left and right eye encoding neurons (Fig. 4a). Monocular contralateral encoding neurons  
195 showed a volume with fewer neurons 10 to 30  $\mu\text{m}$  ventral to the MLF rotated roughly by 20  
196 degrees along the RC-axis, separating them into two groups (black arrows/inset Fig. 4a).  
197 Monocular slow phase eye velocity neurons are mainly located ventrally to the MLF in rh7/8  
198 and code for the contralateral eye. They are clustered slightly ventro-rostrally to the putative  
199 OI position neurons with some overlap between both clusters. As is the case for the  
200 monocular position neurons, the rh7/8 region contains only few monocular velocity coding  
201 for the ipsilateral eye. Rostral to these identified velocity neurons, some sparse, ungrouped  
202 neurons are located in both hemispheres, extending to the caudal end of rh6 (Fig. 3b;  
203 Supplemental Fig. 3b).  
204 Monocular neurons preferentially active during one monocular stimulation phase and silent  
205 during binocular movements (monocular exclusive) were heavily underrepresented for both  
206 position and velocity (159 of 2508, Supplemental Fig. 4). Neurons exclusively active during  
207 both monocular stimulation phases were virtually absent (Supplemental Fig. 1a & 1e).  
208

## 209 **Binocular neurons**

210 We identified binocular neurons that were always active (BA) or were preferentially active  
211 during the binocular eye movements (binocular preferred, BP). The vast majority of BP  
212 neurons encode eye position, not velocity (Fig. 3c). They overlap with monocular position  
213 coding neurons in rhombomere 7/8, but their centre of mass is biased to a more lateral  
214 position. The rightward and leftward tuned BP neurons are distributed in the right and left  
215 hemispheres, respectively, as expected from the ipsiversive coding scheme. In the ABN, BP  
216 neurons were clustered more ventrally with more neurons in the left hemisphere than in the  
217 right (100 vs. 144; caudal to the Mauthner cells).

218 Binocular position neurons active regardless of stimulated eye or stimulus phase (BA) are  
219 homogeneously distributed in the ABN and putative OI (Fig. 3d), following the pattern of their  
220 monocular counterpart, and no lateralization across hemispheres was observed. However,  
221 those BA neurons that encode velocity form a narrow band (Fig. 3d, right panel) spanning  
222 from the dorsal end of rh6 (within our imaged region) to the location of monocular velocity  
223 coding neurons in rh7/8 and are absent from the remaining ABN and caudal rh7/8 region.

224 While BA neurons responded during all stimulus phases, their responses during monocular  
225 stimulus phases were typically smaller than those during binocular stimulus phases, which  
226 can likely be attributed to the smaller explored motor range during monocular stimulation  
227 (for an assessment of response type classification see discussion in the Methods section,  
228 Supplemental Fig. 3d).

229 While monocular and binocular position neurons shared the same anatomical locations in the  
230 zebrafish hindbrain, an anatomical response type gradient existed for velocity neurons caudal  
231 to rh6 (Fig. 4b): binocular velocity neurons are located more rostro-dorsally while monocular  
232 velocity neurons formed a cluster in the ventral part of rh7/8.

233 Having identified the four primary response types, we next sorted all occurring response types  
234 according to the number of identified neurons for each response type and grouped them  
235 according to the encoded eye direction (CW, CCW), controlled eye muscles (lateral rectus,  
236 medial rectus, or both) and kinematic parameter (eye position or OKR slow-phase velocity).  
237 This analysis (Fig. 4c) reveals that i) position neurons are more frequent in the hindbrain than  
238 slow-phase eye velocity neurons (1938 position vs. 570 velocity), ii) more monocular neurons  
239 coding for the medial rectus exist than monocular neurons coding for the lateral rectus eye  
240 muscle (1043 medial vs. 618 lateral), and iii) using our stimulus protocol we found more  
241 neurons coding for the position of the right eye than for the left eye position (779 right vs.  
242 582 left; this might have been caused by a history dependence, as in 90 % of the recordings  
243 the left eye was monocularly stimulated before the right eye). For all mono- and binocular  
244 regressors we find neurons dorsal to the MLF and rostral to the Mauthner cells which show  
245 an intermingled anatomical distribution of ipsiversive and contraversive response types. This  
246 cluster corresponds to the caudal end of the previously described “hindbrain oscillator” [also  
247 termed ARTR, [3], [5], [6]].

248 To check how tightly the neurons are correlated to each specific eye, we calculated - for all  
249 four major groups - the difference in the correlation to the left and right eye (Supplemental  
250 methods). As expected, binocular neurons were located in the centre and had a unimodal  
251 distribution, while monocular neurons had a more bimodal distribution caused by the left and  
252 right coding population [Fig. 4d, Index running from -1 (more monocular left eye coding) to 1  
253 (more monocular right eye coding)]. When comparing the velocity influence of BA (n=206)  
254 and BP (n=306) position coding neurons (Supplemental methods, Fig. 4e) we found that both  
255 groups showed similar velocity-position distributions, with BA position neurons having a  
256 slightly stronger position component than BP position neurons (two-sided Wilcoxon rank sum

257 test,  $p=5.7 \times 10^{-7}$ , Index running from -1 (Velocity) to 1 (Position)). The firing thresholds (from  
258 the firing threshold analysis, Supplemental Fig. 2) of BP position neurons were shifted towards  
259 the ON direction compared to BA and monocular position neurons and, for the right eye, BA  
260 neurons showed significantly earlier thresholds than MRE neurons (Fig. 4f-g). While the  
261 response type classification used in this study (Fig. 1-3, Fig. 4a-c) is instructive for  
262 understanding the processing repertoire of the oculomotor hindbrain, the results presented  
263 in Fig. 4d-g show that the responsivity of oculomotor neurons forms gradients within the  
264 parameter space spanned by the regressors used for our response type classification. For  
265 example, the BP Position classification could be affected by velocity components and a larger  
266 dynamic range of eye positions during the binocular stimulation phase, and furthermore  
267 some BP neurons were also active during the monocular stimulation phases, albeit at low  
268 activity levels preventing their classification as BA or monocular. Taken together, this suggests  
269 that BA and BP neurons might not be two distinctively separate groups but that they exist  
270 along a continuum, with the extreme cases being BA and BP.

271

## 272 **Differential encoding of velocity and position in individual neurons**

273 Our first experiment was geared towards identifying monocular versus binocular tuning. We  
274 also classified neurons as either mainly position or mainly velocity encoding (Fig. 3) in this  
275 experiment, although intermediate ‘multi-dimensional’ responsivity likely occurs as well. ABN  
276 neurons should receive slow-phase velocity signals during optokinetic stimulation, e.g. via the  
277 pretectum/accessory optic system, vestibular nuclei and the OI [Fig. 1a’; [20], [32]–[35]] since  
278 a muscle force step is needed to overcome the dampened, viscous kinetics of the oculomotor  
279 plant [36], [37]. In order to investigate the differential coding of oculomotor neurons and to  
280 visualize the anatomical distribution of position and velocity coding within rhombomeres 7/8,

281 we developed a binocular closed-loop stimulation protocol to disentangle eye position from  
282 eye velocity correlations by eliciting different eye velocities at different eye positions (Fig. 5a-  
283 a", Methods). This allowed us to consistently evoke combinations of eye position and velocity  
284 which would only occur sporadically during optokinetic responses to fixed stimulus  
285 sequences. At the same time the stimulus protocol minimized the occurrence of fast phase  
286 eye movements (saccades) in order to improve our ability to relate neuronal activity to slow  
287 phase behaviour in this correlative experiment; i.e. the experiment was not designed to  
288 identify or characterize the burst system responsible for generating saccades [3], [38]. From  
289 the whole recording we constructed two-dimensional tuning curves covering the activity for  
290 almost all different eye position and slow phase eye velocity combinations within a certain  
291 range (eye position:  $-15^{\circ}$  to  $+15^{\circ}$ , eye velocity:  $-7$  to  $+7$  degrees/sec, Fig. 5b-d, Supplemental  
292 Fig. 5a-c). Using this protocol we analysed 889 neurons, which exhibited different  
293 combinations of eye position and slow-phase eye velocity tuning. To classify the differences  
294 in position and velocity coding for each neurons we calculated a Position-Velocity index  
295 ( $PV_{\text{index}}$ ) based on the correlation of the neuronal response to behavioural regressors (see  
296 Methods). This index runs from  $-1$  (pure velocity coding) to  $+1$  (pure position coding). Both  
297 neurons tuned exclusively to position (neurons 1) or velocity (neuron 3) exist, as well as  
298 intermediate cases (neuron 2, Fig. 5b-d). For neurons with an intermingled position and  
299 velocity component ( $-0.5 < PV_{\text{index}} < 0.5$ ) the preferred direction was almost always the same  
300 for position and velocity (94%, 440/470).

301

302

303

304 **Firing thresholds of position neurons are distributed across the dynamic range of eye**  
305 **positions while velocity neurons mainly get activated at velocities close to 0°/sec**

306 To quantify the neuronal recruitment we used the two-dimensional tuning curves and  
307 analysed the position and velocity firing thresholds in the position and velocity planes  
308 intersecting with the origin. This procedure results in one-dimensional eye position tuning  
309 curves around eye velocities of 0°/s (black and red line in Fig. 5b-d middle panel) and eye  
310 velocity tuning curves around eye positions of 0° (right panel) for the same neurons. For  
311 position encoding neurons ( $PV_{\text{Index}} > 0$ ,  $n=533$  neurons with identified position threshold) we  
312 find that the eye position thresholds were distributed across the full motor range (roughly -  
313 10° to +10°, Fig. 5e). Leftward and rightward eye position encoding neurons had slightly  
314 different eye position thresholds in our dataset [Wilcoxon rank sum  $p=0.000016$ , median for  
315 rightward coding neurons pooled on ON direction ( $n=250$ ): 5.5, leftward 4.5 ( $n=283$ )]. For the  
316 velocity encoding neurons ( $PV_{\text{Index}} < 0$ ,  $n=279$ ) the activation thresholds for velocity mostly  
317 span a small range mostly between  $\pm 2^\circ/\text{s}$ , so that the calcium signals started to increase at  
318 eye velocities close to 0°/sec. No difference was observed between velocity neurons coding  
319 for leftward vs. rightward velocities (Fig. 5f, Wilcoxon rank sum  $p=0.24$ ; rightward  $n=104$ ,  
320 leftward  $n=175$ ). For the majority of velocity neurons, the velocity tuning curve did not cross  
321 the velocity of 0°/s, i.e. the neurons were only active for either positive or negative velocities.  
322 Also the strongest fluorescence increases were usually observed after crossing a velocity of  
323 0°/s. However, the true firing thresholds may start further into the OFF direction ( $\leq 0^\circ/\text{s}$ ) as  
324 we likely couldn't reliably detect single action potentials using GCaMP6f in our preparation  
325 [39].

326 Visual inspection of all strong velocity neurons ( $PV_{\text{Index}} < -0.5$ ) revealed that some of the  
327 identified velocity neurons showed firing saturation at higher velocities (29 %; 40 of 139; Fig.

328 5g). Calcium indicator saturation, which occurs at high calcium concentrations ( $[Ca]^{2+} \gg K_d$ ), is  
329 unlikely to account for the observed fluorescence saturation, since the dynamic range of  
330 fluorescence values ( $F_{Max}/F_{Min}$ ) was (i) much smaller ( $\sim 2.5$ ) than the published range of the  
331 GCaMP6f indicator (51.7) [39], and (ii) similar for non-saturating position neurons and  
332 saturating velocity neurons (Fig. 5g).

333 For neither of the two velocity tuning types (saturating vs. non-saturating) a clear anatomical  
334 clustering is visible (Supplemental Fig. 6) and we therefore merged the corresponding  
335 neurons into one group (potentially the non-saturating neurons could still saturate at higher  
336 eye velocities not reached in our experimental protocol).

337

### 338 **No anatomical gradients of oculomotor tuning thresholds in the hindbrain**

339 In order to investigate topographical arrangements of tuning thresholds in the hindbrain, we  
340 generated anatomical maps of firing thresholds for position ( $P_{Thres}$ ) and velocity ( $V_{Thres}$ ) for  
341 position neurons with an identified threshold ( $PV_{Index} > 0$ ,  $n=533$ , Supplemental Fig. 7a) and  
342 for velocity neurons ( $PV_{Index} < 0$ ,  $n=279$ , Supplemental Fig. 7b). Position thresholds do not  
343 appear to be anatomically grouped and no clear anatomical gradient within any of the  
344 neuronal clusters could be identified (Kruskal-Wallis test for position threshold differences  
345  $p=0.07$ ;  $rh5: 214$ ;  $rh6: 249$ ;  $rh7/8: 27$ ). We investigated whether MNs (based on anatomical  
346 location) are distributed topographically according to position firing threshold, but were  
347 unable to identify a significant gradient [Kruskal-Wallis  $p=0.22$ , Supplemental Fig. 7a].

348 Eye velocity thresholds ( $V_{Thres}$ ) also did not show any spatial clustering and no gradient could  
349 be observed within the hindbrain. No statistical difference was observed (Kruskal-Wallis  
350  $p=0.79$ ;  $rh5: 11$ ;  $rh6: 10$ ;  $rh7/8: 184$ ).

351

## 352 **Neurons in rhombomere 7/8 exhibit a velocity-to-position gradient**

353 The anatomical clusters of position and velocity coding neurons that we identified using the  
354  $PV_{\text{Index}}$  are generally in agreement with those obtained from the separate experiment  
355 described above (compare Fig. 6a-c to Fig. 3 & Supplemental Fig. 3). Neurons in the ABN  
356 (rh5/rh6) displayed an average  $PV_{\text{Index}}$  of 0.44 ( $\pm 0.23$  STD;  $n=521$ ) indicating position tuning  
357 with some minor velocity sensitivity. Within the ABN, the velocity component was strongest  
358 around the previously described gap (see Fig. 4a, black arrows) in-between two clusters of  
359 neurons 20  $\mu\text{m}$  ventral to the MLF. The velocity neurons identified using the velocity-position  
360 stimulus reside in the ventral part of rh7/8 and extend into the area caudal to rh6, overlapping  
361 with the volumes containing the BA, MLE and MRE velocity neurons (Fig. 3b-d, Supplemental  
362 Fig. 3b). In the caudal part of rhombomeres 7/8 we find neurons with more position coding  
363 dependence than in the rostral part, especially laterally (Fig. 6a-c). Following the anterior-  
364 posterior and ventral-dorsal axes in the caudal hindbrain (rh7/8), our analysis therefore  
365 reveals a prominent  $PV_{\text{Index}}$  gradient, shifting from velocity towards an intermingled  
366 velocity/position tuning with neurons exhibiting a stronger position coding at the dorso-  
367 caudal end (Fig. 6a).

368

369

370

371

372

373

374

375



376 **Discussion:**

377

378 We investigated the binocular coordination, eye velocity and position sensitivities, as well as  
379 associated recruitment orders and anatomical distributions of oculomotor neurons in the  
380 zebrafish hindbrain.

381 We find four predominant response types, comprised of two monocular and two binocular  
382 types (Fig. 7). Monocular neurons consist of MNs, INNs, putative OI, VSM and IO neurons. We  
383 found that abducens INNs are mainly located dorsally to the MNs (Fig. 4) and together mainly  
384 code for eye position (Fig. 7b). In the caudally adjacent rhombomeres 7 and 8, oculomotor  
385 neurons mainly code for eye velocity and form a rostro-caudal velocity-to-position gradient.  
386 No clear segregation between velocity and position encoding neurons could be identified in  
387 this volume, suggesting that oculomotor integrator and the velocity storage mechanism  
388 merge smoothly at this developmental stage. A large fraction of neurons preferentially  
389 encode binocular eye movements showing that the recruitment of neurons depends on the  
390 executed behaviour (monocular or binocular OKR). Given the number of identified neurons,  
391 those coding monocularly for the lateral rectus in OI and VSM are almost absent (Fig. 4, Fig.  
392 7c), which is discussed further below.

393

394 **Anatomical organisation of MNs and INNs in the ABN**

395 To reveal the anatomical volumes containing MNs and INNs in the ABN we made use of the  
396 fact that the lateral rectus eye muscle is innervated by ABN MNs and should increase its  
397 activity during ipsiversive (temporal/abducting) movements of the ipsilateral eye. We report  
398 the location of MNs to be limited to the ventral ABN, which is in line with transgenic marker

399 lines for *mnx1+* motoneurons [*vu504Tg*, [40]]. The INNs are located more dorsally with only  
400 a small intermingled zone between the MNs and INNs. This is in line with data from goldfish  
401 where ventral MNs and more dorsal INNs form 4 separate clusters with 2 of them being  
402 adjacent and - to some extent - intermingled with each other [41], [42].

403 In our data we see a faint gap (20  $\mu\text{m}$  ventral to the Mauthner cells) running along a dorso-  
404 lateral to medio-ventral axis in the cluster of putative INNs, which separates them into two  
405 groups (black arrows Fig. 4a). While the dorsal and the ventral domain both carry mainly the  
406 same information (contralateral eye encoding, ipsiversive eye positions), the dorsal group is  
407 in close proximity to a group of neurons recently investigated and identified as the medial  
408 vestibular nucleus (MVN) by D. Schoppik and colleagues [[43], which has been registered in  
409 the z-brain atlas using the *Tg(-6.7FRhcrtr:gal4VP16)* line [44]]. However, our dorsal group of  
410 neurons covers a larger volume and extends more medially than the annotated MVN in the  
411 z-brain atlas and mainly codes for eye position, not slow-phase velocity. It is nonetheless  
412 possible that the dorsal group partially corresponds to the MVN.

413 Very ventrally we find a group of neurons extending rostrally from the pool of rh5 MNs coding  
414 for eye position monocularly and binocularly (Fig. 7b, [40 to -40  $\mu\text{m}$  on AP axis, -60  $\mu\text{m}$  on DV  
415 axis]). As they are not located in the ABN nor labelled in a line specifically labelling MNs  
416 (*vu504Tg*), these neurons likely do not project to the extraocular muscles and instead might  
417 carry efference copy signals.

418

### 419 **Anatomical organisation of the caudal hindbrain (rhombomeres 7/8)**

420 Neurons at the ventral-caudal end of the hindbrain were located very close to the floor plate  
421 of the brain, and overlapped with the anatomical location of the inferior olive [45], as were  
422 neurons more than 70  $\mu\text{m}$  lateral from the MLF in the caudal hindbrain. We did not see a clear

423 anatomical-functional segregation of eye-movement correlated putative OI and inferior olive  
424 neurons. Our results and the previous studies suggest that within our cluster of oculomotor  
425 neurons in rh7/8, the medial-rostral, as well as the medial-caudal-dorsal neurons correspond  
426 to the OI, while the ventral-caudal neurons correspond to the inferior olive [compare Fig. 5g-  
427 j in [46], Fig. 2 in [13]]. Comparing the medio-lateral extent of our putative OI neurons we do  
428 not find neurons closely located to the midline as shown in other studies [12]–[14], [46]. As  
429 these medially located neurons were reported to be located more dorsally, our recordings  
430 might have missed such neurons in dorso-caudal regions. However, in a recent EM study  
431 medially located neurons have been found exclusively at the rostral end of rh7 [boundary to  
432 rh6, Fig. 1d and Supplemental Fig. 3 in [14]], an area which we extensively imaged and which  
433 contains many velocity sensitive neurons (rh7) as well as position sensitive neurons in rh6  
434 (ABN/MVN).

435 The axonal projection patterns of our reported functional neuron types remain to be  
436 identified. The majority of our OI neurons are located ventral to the MLF, likely overlapping  
437 with the glutamatergic stripes 1 & 2 [Fig. 2a in [13]] and the GABAergic stripe S2, which  
438 contain both ipsilaterally and contralaterally projecting axons.

439

#### 440 **Lack of monocular coding for the lateral rectus muscle in the caudal hindbrain**

441 We show that monocular neurons in rhombomeres 7/8 almost exclusively encode the  
442 contralateral eye in larval zebrafish. In monkeys it was reported that 50 % of monocular burst-  
443 tonic neurons in the nucleus prepositus hypoglossi (NPH) and medial vestibular nucleus  
444 (MVN, mammalian equivalents to the OI) code for the ipsi- or contralateral eye during  
445 disjunctive fixation/saccades [47], while another study reports “most” (*sic*) of monocular NPH  
446 neurons to be related to the ipsilateral eye [48]. Data from goldfish also shows that only 4%

447 of neurons in Area I (equivalent to OI) code for the contralateral eye and 57 % for the  
448 ipsilateral eye during monocular stimulation [49].

449 Therefore, a lack of monocular coding for one extraocular eye muscle can be observed in the  
450 oculomotor integrator. While Debowy and colleagues [49] find almost no monocular  
451 integrator neurons coding for the nasal part (medial rectus) of the contralateral eye in  
452 goldfish, in the present study we are missing monocular neurons encoding the temporal  
453 hemisphere (lateral rectus) of the ipsilateral eye (Fig. 7c). This part would only be encoded in  
454 the binocular context.

455

#### 456 **A mixed, but task-specific monocular-binocular code**

457 Almost all neurons described in this study were active during conjugate eye movements.  
458 According to Hering's hypothesis monocular eye movements are not effected by monocular  
459 signals, but by the summation of binocular signals, which oppose each other in one eye and  
460 summate in the other eye, thereby effecting monocular eye movements by means of  
461 binocular conjugacy and vergence commands. While we did find BA neurons (whose response  
462 profiles are in line with conjugacy commands), the (almost complete) lack of neurons coding  
463 for vergence (which would be active only during disconjugate/monocular eye movements in  
464 our experiments) is in disagreement with Hering's hypothesis. On the other hand, functional  
465 neuron types tuned to a single eye are abundant in the zebrafish hindbrain. These neurons  
466 are active regardless of whether the eye movement was monocular or conjugate and their  
467 existence conforms to Helmholtz' hypothesis.

468 The functional structure of the zebrafish ABN shows that recruitment of neuronal pools  
469 depends on the executed OKR behaviour. The BP pool is preferentially activated during  
470 conjugate eye movements and less active during monocular eye movements. The anatomical

471 location of the dominant cluster of BP neurons in the ventral part of the zebrafish ABN,  
472 intermingled with monocular coding neurons, suggests that many of these BP neurons are  
473 indeed MNs. The fact that ABN motoneurons differ in their eye preference and also encode  
474 binocular information has previously been shown in monkeys by W. M. King and colleagues  
475 [[48], [50]–[52], discussed in [53]]. The functional classification (monocular or binocular  
476 encoding) thus does not necessarily correspond to the connected extraocular eye muscle, as  
477 ABN motoneurons connect exclusively to the LR muscle of the ipsilateral eye. Our finding  
478 represents a deviation from a strict final common pathway: neurons coding for the same eye  
479 in different behavioural contexts (binocular vs. monocular OKR) are differentially recruited in  
480 these two contexts. Furthermore, if an extraocular motoneuron gets recruited only in certain  
481 behavioural contexts (e.g. conjugate eye movements), the lack of motoneuron activity for the  
482 innervated eye (e.g. during monocular eye movement) must be compensated by other  
483 neurons or elsewhere in the system [54]–[56] to maintain the eye position. Future studies are  
484 needed to reveal how the oculomotor system reconciles this apparent paradox, and the small  
485 number of cells involved in the larval zebrafish could facilitate corresponding experiments.

486

#### 487 **Recruitment orders for eye position and eye velocity**

488 The analysis of one-dimensional tuning curves for eye velocity revealed that velocity encoding  
489 neurons in the zebrafish hindbrain each increase their firing for one out of the two directions  
490 tested, but are not strictly direction-selective: a minority of neurons already start firing during  
491 slow-phase eye movements into the non-preferred direction. This feature of eye velocity  
492 tuning has previously been observed in individual neurons of the goldfish Area II as well (cf.  
493 Fig. 7b in [23]). However, activations for non-preferred directions were mostly of small  
494 magnitude in our data and it remains possible that recording noise or sampling errors affected

495 the identified velocity thresholds. Due to the above described saturation of velocity signals, a  
496 fraction of velocity neurons exclusively encode information for very slow eye velocities, which  
497 might enable more precise control of eye velocity in the velocity regime close to 0°/s. The eye  
498 position firing thresholds of position neurons, however, distribute across the dynamical range  
499 of eye positions, which is in agreement with previous reports on the recruitment order in the  
500 ABN and OI of other species [18]–[20], [57]–[59]. Our analysis of tuning thresholds did not  
501 reveal any anatomical gradients for these eye position and velocity thresholds. This includes  
502 the MNs located in the ABN (Supplemental Fig. 7a) for which a soma size gradient has been  
503 reported recently [60].

504

#### 505 **The existing correlations to retinal slip signals remain to be investigated**

506 In order to generate many and quickly changing eye movements within the limited recording  
507 time of our experiments, we chose to use relatively high stimulus velocities. This caused low  
508 optokinetic gains [24] and considerable error signals resulting from the remaining retinal slip  
509 during slow-phase eye movements. Next to the eye velocity correlations which we describe  
510 in this study, these slip signals correlate with the activity of velocity neurons as well. We  
511 checked the full dataset of the velocity/position experiment and found that only 4 out of 635  
512 neurons showed a better correlation to a retinal slip signal than to eye position or velocity  
513 (correlation analysis, data not shown).

514

#### 515 **Persistent activity generation likely relies on the observed velocity-to-position gradient in** 516 **the caudal hindbrain**

517 Our analysis of differential position versus velocity encoding ( $PV_{\text{index}}$ ) revealed dominance of  
518 position coding in the ABN (rh 5/6) and an anatomical velocity-to-position gradient of

519 oculomotor neurons in rhombomere 7/8, which have stronger velocity weights in the rostral  
520 part of rhombomere 7/8 and stronger position weights in the caudal part.

521

522 The rostral part of our identified velocity coding neurons (in rh7) likely corresponds to the  
523 velocity storage mechanism [Area II in fish, [21], [22]], which is rostrally adjacent to the OI  
524 (Area I) in goldfish. While in adult goldfish a clear functional separation of Areas I and II has  
525 been reported, in the larval zebrafish, the velocity and position encoding in rh7/8 appears to  
526 form a gradient, making it difficult to draw a border between the velocity storage mechanism  
527 and the OI. While the velocity storage mechanism is still maturing in 5 dpf old larval zebrafish  
528 (it only stores the velocity for one or two seconds as measured using the optokinetic after-  
529 nystagmus [[25], and own observations]), the hindbrain already contains a high number of  
530 velocity coding neurons.

531 Our data suggests that the velocity-to-position gradient extends well into the anatomical  
532 region of the OI and does not reach exclusive position sensitivity. Therefore the OI appears to  
533 perform only a partial integration (at this developmental stage), where the velocity signals  
534 are integrated into an intermediate velocity-position state [61], [62]. This gradient is in  
535 agreement with a previous publication which identified a change of persistence times in the  
536 OI along the rostral-caudal and dorsal-ventral axis [12]. These results suggest that integration  
537 is achieved by a feed-forward organisation of neurons, which gradually change in their  
538 position/velocity coding and persistence time. While partial integration can theoretically  
539 explain the heterogeneity and spatial gradients of time constants within the integrator some  
540 contradictions to integrator models still remain [63].

541 It has been previously reported that the activity of the zebrafish OI encodes two separate  
542 parameters [64]: while the amplitude of OI neuron activity represents eye position, the spatial  
543 pattern of persistent firing represents the context of how the eyes reached that position. If  
544 eye positions were reached during optokinetic behaviour, the rostral neurons of the OI  
545 showed more persistent activity, while during spontaneous saccadic movement the spatial  
546 pattern was reversed. Our results show that in parallel to the previously reported context-  
547 dependent anatomical gradient, slow-phase eye velocity is encoded in a similar gradient as  
548 well, such that (based on their anatomical rh7/8 location) neurons recruited during OKR are  
549 likely to also have a higher velocity sensitivity.

550

### 551 **Conclusion:**

552 Our findings characterize the functional layout of the oculomotor hindbrain in zebrafish. They  
553 reveal the functional oculomotor architecture regarding a set of key parameters  
554 (monocular/binocular encoding, position/velocity encoding, tuning curve/firing thresholds,  
555 anatomy) useful for future investigations into mechanisms underlying persistent activity and  
556 sensorimotor transformations. We provide evidence for a mixed but task-specific binocular  
557 code and suggest that generation of persistent activity is organized along the rostro-caudal  
558 axis in the larval hindbrain.

559

560

561

562

563

564



565 **Material & Methods:**

566 Fish husbandry:

567 Zebrafish (*danio rerio*) expressing GCaMP6f were used in the experiments [*Tg(ubi:nls-*  
568 *GCaMP6f)m1300*; Additional file 1]. Larvae were raised in a 14/10 h day/night cycle incubator  
569 at 29 °C in E3 solution containing methylene blue. Fish were kept in a TL/N [*nacre*; [65]]  
570 background, imaged larvae were *nacre* -/-.

571

572 Transgenesis:

573 The *Tg(ubi:nls-GCaMP6f)m1300* line was created using the Tol2 transposon system [66] and  
574 Gateway cloning (Invitrogen, 12537-023, Version D). Briefly, an attB1 primer  
575 (GGGGACAAGTTTGTACAAAAAAGCAGGCTACCATGGCTCCAAAGAAGAAGCGTAAGGTATGGGTTCTCATCATCA  
576 TC) including Kozak [67] and nls [68] sequences was used to amplify GCaMP6f [[39], Addgene  
577 plasmid #40755 pGP-CMV-GCaMP6f]; the ubi promoter [3.5 kb, [69], Addgene plasmid  
578 #27320] was inserted into the pENTR5' plasmid. pENTR5' (ubi), pME (nls-GCaMP6f) and  
579 pENTR3' (polyA) sequences were then cloned into the pDestTol2pA2 plasmid via an LR  
580 reaction. 25 ng/μl plasmid DNA and 50 ng/μl Tol2 *transposase* mRNA were co-injected into  
581 single cell stage embryos (*nacre* +/-). F2 or fish of later generations were used for data  
582 acquisition.

583

584 Animal preparation and 2P imaging:

585 Larvae (5-7 dpf) were screened for *nacre*-/- and strong GCaMP expression under an  
586 epifluorescence microscope (Nikon SMZ25, Tokyo, Japan). They were mounted in a 35 mm  
587 petri dish lid in 1.6 % low melting agarose in E3. The agarose surrounding the eyes was

588 removed to ensure unhindered eye movements [70]. During the experiment the fish were  
589 kept in E3 solution devoid of methylene blue.

590

#### 591 Microscope Setup:

592 The setup was based on a previously published study [1]. In short, stimuli were presented as  
593 vertical gratings (12 roughly equally spaced, red, vertical bars per 360°) rotating horizontally  
594 around the larvae on a custom-made LED arena. Note that the 700 lp dichroic illustrated in  
595 Fig. 1b reflected only a fraction of the 850 nm IR-LED light to the sample, which still sufficed  
596 to fill out the hole in the IR-LED ring and thus provide back-illumination of the larval eyes for  
597 camera detection. Calcium signals were recorded on a hindbrain patch of ~280 x 280 µm at 2  
598 fps on a MOM microscope [Sutter Instruments, Novato, USA; [71]] using C7319 preamplifier  
599 (Hamamatsu Photonics K.K., Hamamatsu, Japan) and Sutter's MScan software (Version  
600 2.3.0.1), a 2-photon IR laser (Coherent Chameleon Vision S; 920 nm excitation wavelength;  
601 Coherent Inc., Santa Clara, USA) and a 25x Objective (Nikon CFI75, Tokyo, Japan). Stimulation  
602 and eye movement recordings were achieved via an precursory version of ZebEyeTrack [72]  
603 running in the LabVIEW environment (National instruments, Austin, USA) and a CMOS camera  
604 (DMK 23UV024, The Imaging Source GmbH, Bremen, Germany). Stimulus speed was chosen  
605 for each fish individually depending on the experiment conducted (see below) in order to  
606 preferentially generate robust slow phases covering a large dynamic range of eye positions  
607 and minimize the occurrence of quick phases (saccades).

608

#### 609 Stimulus protocol for the experiment on monocular versus binocular motor drive

610 The stimulus protocol was subdivided into three parts, each lasting for 150 seconds. In the  
611 first two parts only one eye received a moving stimulus (hereafter referred to as the

612 stimulated eye) while the other eye received a stationary stimulus, and in the third part both  
613 eyes were stimulated. The binocular zone was blocked by black aluminium foil (BKF12,  
614 Thorlabs, Newton, USA) the whole time. Stimulus direction changed every 8-10 sec with a  
615 stable stimulus for 2-4 sec after each direction change. The average stimulus speed during  
616 motion phases across animals was 39 degrees/sec  $\pm$  11 degrees/sec (STD). Stimulus  
617 parameters were chosen for each fish individually to minimize occurrence of saccades. During  
618 monocular stimulation a stationary vertical grating was shown to the OFF eye to minimize  
619 yoking. In 137 recordings the left eye was stimulated first, in 15 the right. For illustration and  
620 analysis purposes the latter were reshaped to match the other recordings.

621

#### 622 Stimulus protocol for the experiment on velocity vs. position neuronal tuning

623 In the beginning of this stimulus protocol, an alternating OKR stimulus was presented (8 sec  
624 CW, 8 sec CCW, 12 repetitions) which was followed by a closed loop protocol in which  
625 successful completion of particular eye position/eye velocity combinations was ensured by  
626 real-time eye position monitoring. Here, eye position bins were defined, each 2° wide. In 57  
627 recordings, bins were defined between  $\pm$  10°, in 3 recordings between  $\pm$  8°, which  
628 corresponded to the well-explored dynamic range of horizontal eye movements. For each eye  
629 position bin, the eyes were first driven via the optokinetic response into this bin and then the  
630 stimulus velocity was reduced to zero. If the larva kept its gaze centred within that bin for 4  
631 seconds, the quality criterion was passed, and if the mean eye position moved outside the  
632 respective bin boundaries during the 4 seconds, this part was repeated until it finished  
633 successfully. Then, the eye position passed through each bin in CW and CCW directions with  
634 different stimulation speed (baseline speed, 1.2 x and 1.4 x of the baseline speed). If a saccade  
635 occurred, the current step of the protocol was repeated. The whole closed loop protocol was

636 repeated three times. The average baseline stimulation speed was 31 degrees/sec  $\pm$  13  
637 degrees/sec (STD). Stimulation speed was altered if fish behaviour changed during the  
638 experiment.

639

640 Identification of neurons with oculomotor tuning (data analysis):

641 All data analysis was done in MATLAB (MathWorks, Natick, USA). Regions of interest (ROIs)  
642 were semi-automatically identified as previously published [Correlation Analysis, 3D mapping,  
643 [1]]. This method was altered such that we could apply several regressors at once to a  
644 recording, thus enabling us to identify neurons with different coding features at once. For this  
645 purpose, each pixel surpassing the z-score threshold for any of the regressors was coloured  
646 in the anatomical image according to its absolute maximal z-score across regressors, resulting  
647 in a heat map. This was done to identify eye movement related pixels, tighter exclusion  
648 criteria are applied later in the analysis pipeline depending on the experiment conducted.

649 Regressors used in this study (averaged across both eyes):

- 650 • rectified low eye velocity (capped at 20 degrees/sec, separate regressors for CW and  
651 CCW directions)
- 652 • rectified high eye velocity (velocities higher than 20 degrees/sec in CW and CCW)
- 653 • angular eye position

654 Since the GCaMP expression was restricted to the nucleus, all drawn ROIs corresponded to  
655 somatic signals.

656

657 Each recorded optical slice was manually registered in x, y, and z planes, to a recorded z-stack  
658 of the same animal. The Mauthner cells and the medial longitudinal fasciculus (MLF) served  
659 as landmarks within the z-stack in order to combine data from multiple slices and animals into

660 a single reference coordinate system in which the point on the midline between the Mauthner  
661 cell somata served as the origin [based on [1]]. This approach accounted for differences in the  
662 pitch, roll and yaw of individual fish. It was ignorant about inter-individual hindbrain size  
663 variations.

664

665 Binocular coordination experiment data analysis:

666 Data used in this experiment was recorded from 15 larvae (5-7 days post fertilization, dpf).  
667 Recordings in which the eye movements surpassed the yoking index were excluded from  
668 analysis (~ 28 % of original recordings) beforehand (see Supplemental Fig. 1b and  
669 Supplemental Methods) which resulted in an 8-fold coverage of the imaged hindbrain region,  
670 ranging from 30 (dorsal) to -60  $\mu\text{m}$  (ventral) in 5  $\mu\text{m}$  intervals around the Mauthner cells (rh  
671 4-8; xy position kept stable for different z-levels, 152 recordings total), due to previous reports  
672 of the ABN and OI location [2], [3], [12]–[14]. The oculomotor neurons of the caudal hindbrain  
673 that have been identified in this study were located mostly ventrally to the MLF stretching  
674 from the end caudal of rhombomere 6 to the ventro-caudal end of the brain. OI neurons in  
675 larval zebrafish have previously been reported ventral to the MLF and extending to the dorsal  
676 part as well [12]–[14], [46]. One study reported eye position encoding neurons in rh7/8 to be  
677 located more dorsal than other studies, but still overlapping the same volume in the brain [2].  
678 It is therefore possible that we missed some more dorsally located OI neurons, because the  
679 dorsal parts of the hindbrain were not recorded in this study. However, an optogenetic  
680 perturbation study found the maximum effect on integrator performance in rostral areas of  
681 the OI 50 to 150  $\mu\text{m}$  caudal to the Mauthner cells [17], suggesting that the relevant anatomical  
682 regions have been well sampled in this study.

683

684 To classify the response quality and type of each neuron we performed a regression analysis.

685 For each ROI the  $\Delta F/F$  (DFF) calcium time series was smoothed using a 5-time-points sliding

686 window kernel filter, with the DFF at the time  $k$ :

687

$$DFF_k = \frac{DFF_{k-2} * 0.25 + DFF_{k-1} * 0.5 + DFF_k + DFF_{k+1} * 0.5 + DFF_{k+2} * 0.25}{2.5} \quad (1)$$

688

689 Each eye position trace was offset by its respective median to account for individual resting

690 eye position (negative eye position and eye velocity is defined as left or leftward respectively).

691 The DFF trace of each ROI was then correlated with several traces derived from behavioural

692 data (eye position/velocity), which we refer to as “regressors”.

693

694 We created regressors based on conservative inclusion criteria. Each regressor was i) either

695 coding for eye velocity or eye position, ii) had different combinations of activity during the

696 individual stimulation phases, iii) rectified in plus or minus direction. In addition we tested

697 two (duplicate) types of regressors sets, one in which the monocular phase activity was

698 derived from the eye trace of the respective eye (for monocular regressors), and one in which

699 this monocular phase activity was derived from the average of both eyes during this

700 stimulation phase. The second set was more reliable for BA neuron identification as the motor

701 range in the monocular phases was smaller than the one in binocular phases in most of the

702 recordings. This resulted in a total of 52 regressors (Supplemental Fig. 1a+d).

703 The rectified regressors were then convolved with a “calcium impulse response function”

704 (CIRF) [46] to account for the GCaMP dynamics in our experiments (1.1 sec measured *in vivo*

705 by observing exponential signal decay of position encoding neurons after a saccade in the null

706 direction). Velocity was capped at 8 degrees/sec (the regressor was set to 8 degrees/sec if the  
707 velocity exceeded 8 degrees/sec) to eliminate burst sensitivity (saccade generator). Neuronal  
708 ROIs with a correlation of at least 0.6 to any of the regressors were then kept for further  
709 analysis.

710 We excluded neurons from recordings in which the non-stimulated eye responded during  
711 monocular stimulus phases (Yoking index threshold, Supplemental Fig. 1b).

712 To exclude the possibility that some neurons were erroneously classified as  
713 monocular/binocular preferred due to eccentric firing thresholds and the fact that the  
714 dynamic eye position range differed during monocular and binocular stimulation (usually it  
715 was smaller during monocular stimulation), we calculated the firing threshold during the  
716 binocular phase and only kept neurons which reached that threshold during the monocular  
717 phases. This resulted in the exclusion of 23% (732 excluded, 2508 revised and confirmed) of  
718 neurons in this follow-up analysis (for full methods description see Supplemental Methods  
719 and Supplemental Fig. 2).

720 With the exception of regressors for BA neurons (r5, r6, r17, r18 for position), we did not  
721 observe any notable difference in the location or amount of identified neurons for averaged  
722 and non-averaged regressors (Supplemental Fig. 3 c, d). This is explainable by the fact that  
723 the motor range was smaller during the monocular phases and thus the resulting DFF trace is  
724 more representative of the averaged eye position trace (Supplemental Fig. 1c). As the  
725 resulting differences were small, we pooled the corresponding regressors (average and non-  
726 averaged ones) for further analysis.

727

728

729

730 Data analysis for experiment on velocity vs. position neuronal tuning

731 Data used in this experiment was collected from 8 recorded fish (5-7 dpf) which resulted in a  
732 6-fold coverage of the imaged hindbrain region (same area imaged as for binocular  
733 coordination experiment), ranging from 30 to -60  $\mu\text{m}$  around the Mauthner cells in 10  $\mu\text{m}$   
734 intervals, to cover the same area as in the previous experiment (60 recordings total). ROIs  
735 were selected as previously described and considered for further analysis if their correlation  
736 to any of the rectified position or slow velocity regressors (capped at  $8^\circ/\text{s}$ ) used in the ROI  
737 acquisition exceeded 0.4 (different threshold to previous experiment as this step was only to  
738 ensure neurons with position and velocity encoding were still included for downstream  
739 analysis). The  $PV_{\text{Index}}$  was calculated based on correlation with the respective highest scoring  
740 position and velocity regressor according to the following equation:

741

$$PV_{\text{Index-Corr}} = \frac{\text{Corr}(\text{Position}) - \text{Corr}(\text{Velocity})}{\text{Corr}(\text{Position}) + \text{Corr}(\text{Velocity})} \quad (2)$$

742

743 Of 889 neurons approved in the previous analysis 17 had a negative correlation for either  
744 both position or velocity regressors and were thus excluded from this  $PV_{\text{Index}}$  calculation.

745 For the 2 dimensional tuning curves, all frames from the recording were used (including OKR  
746 stimulation). Frames with a higher eye velocity than  $10^\circ/\text{s}$  and subsequent three frames were  
747 excluded to account for artefacts caused by saccades. Fluorescence was grouped in  $1^\circ$  eye  
748 position bins (from  $-15^\circ$  to  $15^\circ$ ) with the appropriate velocity ( $-7$  degrees/sec to  $7$  degrees/sec)  
749 in bins of 1 degree/sec width.

750

751



752 Firing threshold assessment:

753 To extract the firing thresholds the smoothed (Eq. 1) and deconvolved (CIRF, see above) DFF  
754 was plotted against the binned eye position or velocity (2° increments for position, 1  
755 degree/sec for velocity) tuning curve. Starting three bins from the tail (null-direction) a one  
756 sided, Bonferroni-corrected Wilcoxon rank sum test was calculated for each bin against all  
757 previous bins combined. The firing threshold was defined as the first point with significant  
758 difference to the previous (baseline) data points, where at least one of the following two bins  
759 was also significant.

760 To verify that inactivity of a neuron in the first experiment during a monocular stimulation  
761 phase is due to its intrinsic coding properties and not due to a lack of appropriate behaviour,  
762 the dynamic eye position range for the monocular phases was compared to the firing  
763 threshold during the binocular stimulation. If a neuron did not reach its firing threshold in any  
764 monocular phase it was excluded from further analysis (see Supplemental Fig. 2).

765

766 Statistical information:

767 Statistical testing was performed using MATLAB. Statistical significance level was  $p < 0.05$ . For  
768 the comparison of firing thresholds in the experiment to determine the velocity and position  
769 component, a Kruskal-Wallis test was performed to check for significant differences. Other  
770 statistical tests conducted are reported in the appropriate sections.

771

772

773

774

775 **Declarations:**

776 **Ethics approval:**

777 All animal procedures conformed to the institutional guidelines of the University of Freiburg,  
778 University of Tübingen and local governments (Regierungspräsidium Freiburg,  
779 Regierungspräsidium Tübingen).

780

781 **Data/Material availability:**

782 Data and analysis algorithms (Matlab code) will be deposited in a public repository upon  
783 acceptance of the manuscript.

784

785 **Competing interests:**

786 All authors declare that they have no competing interests.

787

788 **Funding:**

789 This work was funded by the Deutsche Forschungsgemeinschaft (DFG) grants EXC307 (CIN –  
790 Werner Reichardt Centre for Integrative Neuroscience) and INST 37/967-1 FUGG, and the  
791 Juniorprofessor programme grant from the Ministry of Science, Research, and the Arts of the  
792 State of Baden-Württemberg (MWK). The funders had no role in the design, data collection,  
793 analysis, and interpretation of data and in the writing of the manuscript.

794

795 **Author contributions:**

796 C.B. and C.L. recorded the data. C.B. analysed the data. C.B., C.L. and A.B.A. wrote the  
797 manuscript. A.B.A. conceived and supervised the project and secured funding.

798 **Acknowledgements:**

799 We would like to thank Wolfgang Driever, Emre Aksay, Michael B. Orger, Christian Machens  
800 and Claudia Feierstein for helpful discussions on the project. Sebastian Reinig, Kun Wang,  
801 Konstantin F. Willeke and all lab members of the Arrenberg lab for discussion of the project.  
802 Bastian Hablitzel for the mapping of the abducens region in the HGj4a line. Rebecca Meier,  
803 Maximilian Wandl, Sabine Götter for excellent fish care. We would like to thank Fenja Gawlas  
804 and Philipp Rustler for help with generating transgenic zebrafish lines.

805

806

807

808

809

810 **References:**

811

812 [1] F. Kubo, B. Hablitzel, M. Dal Maschio, W. Driever, H. Baier, and A. B.

813 Arrenberg, “Functional architecture of an optic flow-responsive area that

814 drives horizontal eye movements in zebrafish.,” *Neuron*, vol. 81, no. 6,

815 pp. 1344–1359, Mar. 2014.

816 [2] R. Portugues, C. E. Feierstein, F. Engert, and M. B. Orger, “Whole-brain

817 activity maps reveal stereotyped, distributed networks for visuomotor

818 behavior.,” *Neuron*, vol. 81, no. 6, pp. 1328–1343, Mar. 2014.

819 [3] S. Wolf *et al.*, “Sensorimotor computation underlying phototaxis in

820 zebrafish,” *Nat. Commun.*, vol. 8, no. 1, pp. 1–12, Dec. 2017.

821 [4] M. Joshua and S. G. Lisberger, “A tale of two species: Neural integration

822 in zebrafish and monkeys,” *Neuroscience*, vol. 296, pp. 80–91, Jun. 2015.

823 [5] M. B. Ahrens, M. B. Orger, D. N. Robson, J. M. Li, and P. J. Keller, “Whole-

824 brain functional imaging at cellular resolution using light-sheet

825 microscopy,” *Nat. Methods*, vol. 10, no. 5, pp. 413–420, Mar. 2013.

826 [6] T. W. Dunn *et al.*, “Brain-wide mapping of neural activity controlling

827 zebrafish exploratory locomotion,” *Elife*, vol. 5, no. MARCH2016, pp. 1–

828 29, Mar. 2016.

829 [7] D. A. Robinson, “Integrating with neurons,” *Annu. Rev. Neurosci.*, vol. 12,

- 830 pp. 33–45, Jan. 1989.
- 831 [8] H. S. Seung, “How the brain keeps the eyes still.,” *Proc. Natl. Acad. Sci. U.*  
832 *S. A.*, vol. 93, no. 23, pp. 13339–44, Nov. 1996.
- 833 [9] E. Aksay, I. Olasagasti, B. D. Mensh, R. Baker, M. S. Goldman, and D. W.  
834 Tank, “Functional dissection of circuitry in a neural integrator.,” *Nat.*  
835 *Neurosci.*, vol. 10, no. 4, pp. 494–504, Apr. 2007.
- 836 [10] M. Nikitchenko and A. Koulakov, “Neural integrator: a sandpile model.,”  
837 *Neural Comput.*, vol. 20, no. 10, pp. 2379–417, Oct. 2008.
- 838 [11] D. Fisher, I. Olasagasti, D. W. Tank, E. R. F. Aksay, and M. S. Goldman, “A  
839 modeling framework for deriving the structural and functional  
840 architecture of a short-term memory microcircuit.,” *Neuron*, vol. 79, no.  
841 5, pp. 987–1000, Sep. 2013.
- 842 [12] A. Miri, K. Daie, A. B. Arrenberg, H. Baier, E. Aksay, and D. W. Tank,  
843 “Spatial gradients and multidimensional dynamics in a neural integrator  
844 circuit.,” *Nat. Neurosci.*, vol. 14, no. 9, pp. 1150–9, Aug. 2011.
- 845 [13] M. M. Lee, A. B. Arrenberg, and E. R. F. Aksay, “A structural and genotypic  
846 scaffold underlying temporal integration.,” *J. Neurosci.*, vol. 35, no. 20,  
847 pp. 7903–20, May 2015.
- 848 [14] A. Vishwanathan, K. Daie, A. D. Ramirez, J. W. Lichtman, E. R. F. Aksay,  
849 and H. S. Seung, “Electron Microscopic Reconstruction of Functionally

- 850 Identified Cells in a Neural Integrator,” *Curr. Biol.*, vol. 27, no. 14, pp.  
851 2137-2147.e3, Jul. 2017.
- 852 [15] A. Kinkhabwala *et al.*, “A structural and functional ground plan for  
853 neurons in the hindbrain of zebrafish,” *Proc. Natl. Acad. Sci.*, vol. 108, no.  
854 3, pp. 1164–1169, Jan. 2011.
- 855 [16] H. S. Seung, D. D. Lee, B. Y. Reis, and D. W. Tank, “Stability of the Memory  
856 of Eye Position in a Recurrent Network of Conductance-Based Model  
857 Neurons,” *Neuron*, vol. 26, no. 1, pp. 259–271, Apr. 2000.
- 858 [17] P. J. Gonçalves, A. B. Arrenberg, B. Hablitzel, H. Baier, and C. K. Machens,  
859 “Optogenetic perturbations reveal the dynamics of an oculomotor  
860 integrator,” *Front. Neural Circuits*, vol. 8, no. February, p. 10, Jan. 2014.
- 861 [18] E. Aksay, R. Baker, H. S. Seung, and D. W. Tank, “Anatomy and discharge  
862 properties of pre-motor neurons in the goldfish medulla that have eye-  
863 position signals during fixations,” *J. Neurophysiol.*, vol. 84, no. 2, pp.  
864 1035–49, Aug. 2000.
- 865 [19] J. L. McFarland and a F. Fuchs, “Discharge patterns in nucleus prepositus  
866 hypoglossi and adjacent medial vestibular nucleus during horizontal eye  
867 movement in behaving macaques,” *J. Neurophysiol.*, vol. 68, no. 1, pp.  
868 319–32, Jul. 1992.
- 869 [20] J. M. Delgado-García, P. P. Vidal, C. Gómez, and A. Berthoz, “A

- 870 neurophysiological study of prepositus hypoglossi neurons projecting to  
871 oculomotor and preoculomotor nuclei in the alert cat," *Neuroscience*, vol.  
872 29, no. 2, pp. 291–307, Jan. 1989.
- 873 [21] A. M. Pastor, R. R. De la Cruz, and R. Baker, "Eye position and eye velocity  
874 integrators reside in separate brainstem nuclei.," *Proc. Natl. Acad. Sci. U.*  
875 *S. A.*, vol. 91, no. 2, pp. 807–11, Jan. 1994.
- 876 [22] L.-H. Ma, B. Punnamoottil, S. Rinkwitz, and R. Baker, "Mosaic *hoxb4a*  
877 neuronal pleiotropism in zebrafish caudal hindbrain.," *PLoS One*, vol. 4,  
878 no. 6, p. e5944, Jun. 2009.
- 879 [23] J. C. Beck, P. Rothnie, H. Straka, S. L. Wearne, and R. Baker,  
880 "Precerebellar Hindbrain Neurons Encoding Eye Velocity During  
881 Vestibular and Optokinetic Behavior in the Goldfish," *J. Neurophysiol.*,  
882 vol. 96, no. 3, pp. 1370–1382, Sep. 2006.
- 883 [24] J. C. Beck, E. Gilland, D. W. Tank, and R. Baker, "Quantifying the Ontogeny  
884 of Optokinetic and Vestibuloocular Behaviors in Zebrafish, Medaka, and  
885 Goldfish," *J. Neurophysiol.*, vol. 92, no. 6, pp. 3546–3561, Dec. 2004.
- 886 [25] C.-C. Chen *et al.*, "Velocity storage mechanism in zebrafish larvae," *J.*  
887 *Physiol.*, vol. 592, no. 1, pp. 203–214, Jan. 2014.
- 888 [26] B. Bridgeman and L. Stark, *The Theory of Binocular Vision*. Boston, MA:  
889 Springer US, 1977.

- 890 [27] H. von Helmholtz and J. Southall, *Treatise on Physiological Optics, Volume*  
891 *III*. Dover Publications, 2005.
- 892 [28] O. A. Coubard, “Saccade and vergence eye movements: a review of  
893 motor and premotor commands,” *Eur. J. Neurosci.*, vol. 38, no. 10, pp.  
894 3384–97, Nov. 2013.
- 895 [29] C.-C. Chen, C. J. Bockisch, D. Straumann, and M. Y.-Y. Huang, “Saccadic  
896 and Postsaccadic Disconjugacy in Zebrafish Larvae Suggests Independent  
897 Eye Movement Control,” *Front. Syst. Neurosci.*, vol. 10, no. October, p.  
898 80, Oct. 2016.
- 899 [30] I. H. Bianco, A. R. Kampff, and F. Engert, “Prey Capture Behavior Evoked  
900 by Simple Visual Stimuli in Larval Zebrafish,” *Front. Syst. Neurosci.*, vol. 5,  
901 no. December, pp. 1–13, 2011.
- 902 [31] K. Asakawa, S. I. Higashijima, and K. Kawakami, “An *mnr2b/hlxb9lb*  
903 enhancer trap line that labels spinal and abducens motor neurons in  
904 zebrafish,” *Dev. Dyn.*, vol. 241, no. 2, pp. 327–332, 2012.
- 905 [32] J. Lannou, L. Cazin, W. Precht, and M. Le Taillanter, “Responses of  
906 prepositus hypoglossi neurons to optokinetic and vestibular stimulations  
907 in the rat,” *Brain Res.*, vol. 301, no. 1, pp. 39–45, May 1984.
- 908 [33] R. J. Leigh and D. S. Zee, *The Neurology of Eye Movements*, 4th ed. New  
909 York, NY: Oxford University Press, 2006.



- 910 [34] O. A. Masseck and K.-P. Hoffmann, “Comparative Neurobiology of the  
911 Optokinetic Reflex,” *Ann. N. Y. Acad. Sci.*, vol. 1164, no. 1, pp. 430–439,  
912 May 2009.
- 913 [35] A. F. Fuchs, C. R. S. Kaneko, and C. A. Scudder, “Brainstem Control of  
914 Saccadic Eye Movements,” *Annu. Rev. Neurosci.*, vol. 8, no. 1, pp. 307–  
915 337, Mar. 1985.
- 916 [36] T. Raphan and B. Cohen, “Brainstem Mechanisms for Rapid and Slow Eye  
917 Movements,” *Annu. Rev. Physiol.*, vol. 40, no. 1, pp. 527–552, Mar. 1978.
- 918 [37] D. A. Robinson, “The mechanics of human saccadic eye movement,” *J.*  
919 *Physiol.*, vol. 174, no. 2, pp. 245–264, Nov. 1964.
- 920 [38] P. J. Schoonheim, A. B. Arrenberg, F. Del Bene, and H. Baier, “Optogenetic  
921 localization and genetic perturbation of saccade-generating neurons in  
922 zebrafish,” *J. Neurosci.*, vol. 30, no. 20, pp. 7111–20, May 2010.
- 923 [39] T.-W. Chen *et al.*, “Ultrasensitive fluorescent proteins for imaging  
924 neuronal activity,” *Nature*, vol. 499, no. 7458, pp. 295–300, Jul. 2013.
- 925 [40] L.-E. Jao, B. Appel, and S. R. Wentge, “A zebrafish model of lethal  
926 congenital contracture syndrome 1 reveals Gle1 function in spinal neural  
927 precursor survival and motor axon arborization,” *Development*, vol. 139,  
928 no. 7, pp. 1316–1326, Apr. 2012.
- 929 [41] B. Cabrera, B. Torres, R. Pásaro, A. M. Pastor, and J. M. Delgado-García,

- 930 “A morphological study of abducens nucleus motoneurons and  
931 internuclear neurons in the goldfish (*Carassius auratus*),” *Brain Res. Bull.*,  
932 vol. 28, no. 1, pp. 137–144, Jan. 1992.
- 933 [42] B. Torres, A. M. Pastor, B. Cabrera, C. Salas, and J. M. Delgado-García,  
934 “Afferents to the oculomotor nucleus in the goldfish (*Carassius auratus*)  
935 as revealed by retrograde labeling with horseradish peroxidase,” *J. Comp.*  
936 *Neurol.*, vol. 324, no. 3, pp. 449–461, Oct. 1992.
- 937 [43] D. Schoppik *et al.*, “Gaze-Stabilizing Central Vestibular Neurons Project  
938 Asymmetrically to Extraocular Motoneuron Pools,” *J. Neurosci.*, vol. 37,  
939 no. 47, pp. 11353–11365, Nov. 2017.
- 940 [44] O. Randler *et al.*, “Whole-brain activity mapping onto a zebrafish brain  
941 atlas,” *Nat. Methods*, vol. 12, no. 11, pp. 1039–46, 2015.
- 942 [45] M. B. Ahrens *et al.*, “Brain-wide neuronal dynamics during motor  
943 adaptation in zebrafish,” *Nature*, vol. 485, no. 7399, pp. 471–477, May  
944 2012.
- 945 [46] A. Miri, K. Daie, R. D. Burdine, E. Aksay, and D. W. Tank, “Regression-  
946 Based Identification of Behavior-Encoding Neurons During Large-Scale  
947 Optical Imaging of Neural Activity at Cellular Resolution,” *J.*  
948 *Neurophysiol.*, vol. 105, no. 2, pp. 964–980, Feb. 2011.
- 949 [47] P. a. Sylvestre, J. T. L. Choi, and K. E. Cullen, “Discharge Dynamics of

- 950 Oculomotor Neural Integrator Neurons During Conjugate and Disjunctive  
951 Saccades and Fixation," *J. Neurophysiol.*, vol. 90, no. 2, pp. 739–754, Aug.  
952 2003.
- 953 [48] W. Zhou and W. M. King, "Premotor commands encode monocular eye  
954 movements," *Nature*, vol. 393, no. 6686, pp. 692–695, Jun. 1998.
- 955 [49] O. Debowy and R. Baker, "Encoding of eye position in the goldfish  
956 horizontal oculomotor neural integrator.," *J. Neurophysiol.*, vol. 105, no.  
957 2, pp. 896–909, Feb. 2011.
- 958 [50] W. M. King *et al.*, "Eye position signals in the abducens and oculomotor  
959 nuclei of monkeys during ocular convergence.," *J. Vestib. Res.*, vol. 4, no.  
960 5, pp. 401–8, 1994.
- 961 [51] W. Zhou and W. M. King, "Ocular selectivity of units in oculomotor  
962 pathways.," *Ann. N. Y. Acad. Sci.*, vol. 781, no. 1, pp. 724–8, Jun. 1996.
- 963 [52] P. A. Sylvestre and K. E. Cullen, "Dynamics of abducens nucleus neuron  
964 discharges during disjunctive saccades.," *J. Neurophysiol.*, vol. 88, no. 6,  
965 pp. 3452–68, Dec. 2002.
- 966 [53] W. M. King and W. Zhou, "New ideas about binocular coordination of eye  
967 movements: is there a chameleon in the primate family tree?," *Anat.*  
968 *Rec.*, vol. 261, no. 4, pp. 153–61, Aug. 2000.
- 969 [54] J. M. Miller, R. C. Davison, and P. D. Gamlin, "Motor nucleus activity fails

- 970 to predict extraocular muscle forces in ocular convergence.," *J.*  
971 *Neurophysiol.*, vol. 105, pp. 2863–2873, 2011.
- 972 [55] W. M. King, "Binocular coordination of eye movements - Hering's Law of  
973 equal innervation or unocular control?," *Eur. J. Neurosci.*, vol. 33, no. 11,  
974 pp. 2139–2146, 2011.
- 975 [56] X. Tang, J. A. Büttner-Ennever, M. J. Mustari, and A. K. E. Horn, "Internal  
976 organization of medial rectus and inferior rectus muscle neurons in the C  
977 group of the oculomotor nucleus in monkey," *J. Comp. Neurol.*, vol. 523,  
978 no. 12, pp. 1809–1823, Aug. 2015.
- 979 [57] A. M. Pastor and D. Gonzalez-Forero, "Recruitment order of cat abducens  
980 motoneurons and internuclear neurons.," *J. Neurophysiol.*, vol. 90, no. 4,  
981 pp. 2240–52, Oct. 2003.
- 982 [58] A. M. Pastor, B. Torres, J. M. Delgado-Garcia, and R. Baker, "Discharge  
983 characteristics of medial rectus and abducens motoneurons in the  
984 goldfish.," *J. Neurophysiol.*, vol. 66, no. 6, pp. 2125–40, Dec. 1991.
- 985 [59] a F. Fuchs, C. a Scudder, and C. R. Kaneko, "Discharge patterns and  
986 recruitment order of identified motoneurons and internuclear neurons in  
987 the monkey abducens nucleus," *J. Neurophysiol.*, vol. 60, no. 6, pp. 1874–  
988 1895, Dec. 1988.
- 989 [60] K. Asakawa and K. Kawakami, "Protocadherin-Mediated Cell Repulsion

- 990 Controls the Central Topography and Efferent Projections of the  
991 Abducens Nucleus,” *Cell Rep.*, vol. 24, no. 6, pp. 1562–1572, Aug. 2018.
- 992 [61] T. J. Anastasio, “The fractional-order dynamics of brainstem vestibulo-  
993 oculomotor neurons,” *Biol. Cybern.*, vol. 72, no. 1, pp. 69–79, 1994.
- 994 [62] T. J. Anastasio, “Nonuniformity in the linear network model of the  
995 oculomotor integrator produces approximately fractional-order dynamics  
996 and more realistic neuron behavior.,” *Biol. Cybern.*, vol. 79, no. 5, pp.  
997 377–391, 1998.
- 998 [63] P. Goncalves, “A neural circuit model of the oculomotor integrator:  
999 theory for optogenetic dissection,” *PhD Thesis*, 2013.
- 1000 [64] K. Daie, M. S. Goldman, and E. R. F. Aksay, “Spatial patterns of persistent  
1001 neural activity vary with the behavioral context of short-term memory.,”  
1002 *Neuron*, vol. 85, no. 4, pp. 847–60, Feb. 2015.
- 1003 [65] J. A. Lister, C. P. Robertson, T. Lepage, S. L. Johnson, and D. W. Raible,  
1004 “nacre encodes a zebrafish microphthalmia-related protein that regulates  
1005 neural-crest-derived pigment cell fate.,” *Development*, vol. 126, no. 17,  
1006 pp. 3757–67, Sep. 1999.
- 1007 [66] K. M. Kwan *et al.*, “The Tol2kit: A multisite gateway-based construction  
1008 Kit for Tol2 transposon transgenesis constructs,” *Dev. Dyn.*, vol. 236, no.  
1009 11, pp. 3088–3099, 2007.

- 1010 [67] M. Kozak, "Point mutations close to the AUG initiator codon affect the  
1011 efficiency of translation of rat preproinsulin in vivo.," *Nature*, vol. 308,  
1012 no. 5956, pp. 241–6, 1984.
- 1013 [68] D. Kalderon, B. L. Roberts, W. D. Richardson, and A. E. Smith, "A short  
1014 amino acid sequence able to specify nuclear location.," *Cell*, vol. 39, no. 3  
1015 Pt 2, pp. 499–509, Dec. 1984.
- 1016 [69] C. Mosimann, C. K. Kaufman, P. Li, E. K. Pugach, O. J. Tamplin, and L. I.  
1017 Zon, "Ubiquitous transgene expression and Cre-based recombination  
1018 driven by the ubiquitin promoter in zebrafish," *Development*, vol. 138,  
1019 no. 1, pp. 169–177, Jan. 2011.
- 1020 [70] A. B. Arrenberg, "Fiber Optic-Based Photostimulation of Larval Zebrafish,"  
1021 in *Zebrafish: Methods and Protocols*, vol. 1451, K. Kawakami, E. E. Patton,  
1022 and M. Orger, Eds. New York, NY: Springer New York, 2016, pp. 343–354.
- 1023 [71] T. Euler *et al.*, "Eyecup scope—optical recordings of light stimulus-evoked  
1024 fluorescence signals in the retina," *Pflügers Arch. - Eur. J. Physiol.*, vol.  
1025 457, no. 6, pp. 1393–1414, Apr. 2009.
- 1026 [72] F. A. Dehmelt, A. von Daranyi, C. Leyden, and A. B. Arrenberg, "Evoking  
1027 and tracking zebrafish eye movement in multiple larvae with  
1028 ZebEyeTrack," *Nat. Protoc.*, vol. 13, no. 7, pp. 1539–1568, Jul. 2018.  
1029

1030 **Additional files:**

1031 **Additional file 1:**

1032 Movie1.avi: This movie shows a z-stack of a *Tg(ubi:nls-GCaMP6f)m1300* larvae at 5 dpf  
1033 imaged under the above mentioned setup (except using a x20/1.0 Zeiss objective) resulting  
1034 in an imaged area of 450.56 x 450.56  $\mu\text{m}$  in x and y with 0.88  $\mu\text{m}$  per slice in z. The movie is  
1035 contrast enhanced and imaged with increased laser power (roughly 33 mW after the  
1036 objective) to highlight GCaMP6f expression (same fish as in Fig. 1b).

1037

1038

1039

1040

1041

1042

1043

1044

1045

1046

1047

1048

1049

1050

1051 **Figures:**

1052 **Figure 1: Setup & Circuit overview**

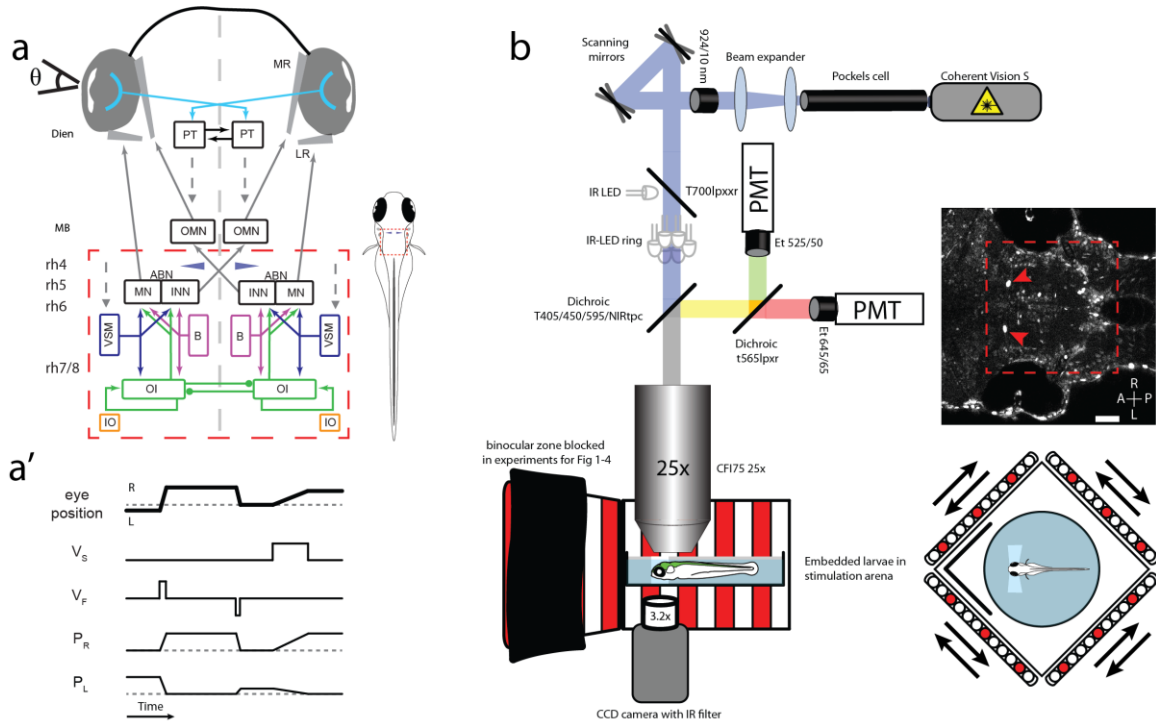

1053

1054

1055

1056

1057

1058

1059

1060

1061



1062 Figure 1: Setup & Circuit overview

1063 **a:** Circuit schematic for horizontal eye movements. Red dashed rectangle represents imaged  
1064 brain area, blue cones show location of Mauthner cells. ABN: abducens nucleus; B: burst  
1065 neurons; Dien: diencephalon; INN: internuclear neurons; IO: inferior olive; LR: lateral rectus;  
1066 MB: midbrain; MN: moto neurons; MR: medial rectus; OMN: nucleus oculomotorius; OI:  
1067 oculomotor integrator; PT: pretectum; rh 4-8: rhombomeres 4-8; VSM: velocity storage  
1068 mechanism;  $\Theta$ : eye position. Dashed arrows indicate direct or indirect inputs from upstream  
1069 visual brain areas. **a'**: Simplified schematic response profiles for hindbrain oculomotor  
1070 neurons during eye position changes. Dashed line represents an eye position or velocity of 0.  
1071 L: left P<sub>L/R</sub>: Position coding neurons left/right, note that P<sub>L</sub> and P<sub>R</sub> have different firing  
1072 thresholds; R: right; V<sub>F</sub>: fast (burst) velocity neurons; V<sub>S</sub>: slow velocity neurons. **b:** Schematic  
1073 of microscopy setup. Agarose-embedded zebrafish larvae were visually stimulated, while eye  
1074 movements were recorded from below and cellular calcium signals were recorded from  
1075 above via a two-photon microscope. Setup not drawn to scale, binocular zone excluded for  
1076 experiment with monocular stimulation only, scale bar 50  $\mu\text{m}$ , red dashed rectangle  
1077 represents imaged brain area, red arrows show GCaMP expression in the nuclei of the  
1078 Mauthner cells, which served as a landmark (blue cones in a and in cell maps). A: anterior; L:  
1079 left; P: posterior; PMT: photomultiplier tubes R: right.

1080

1081

1082

1083

1084 **Figure 2: Experimental strategy to assess binocular coordination**

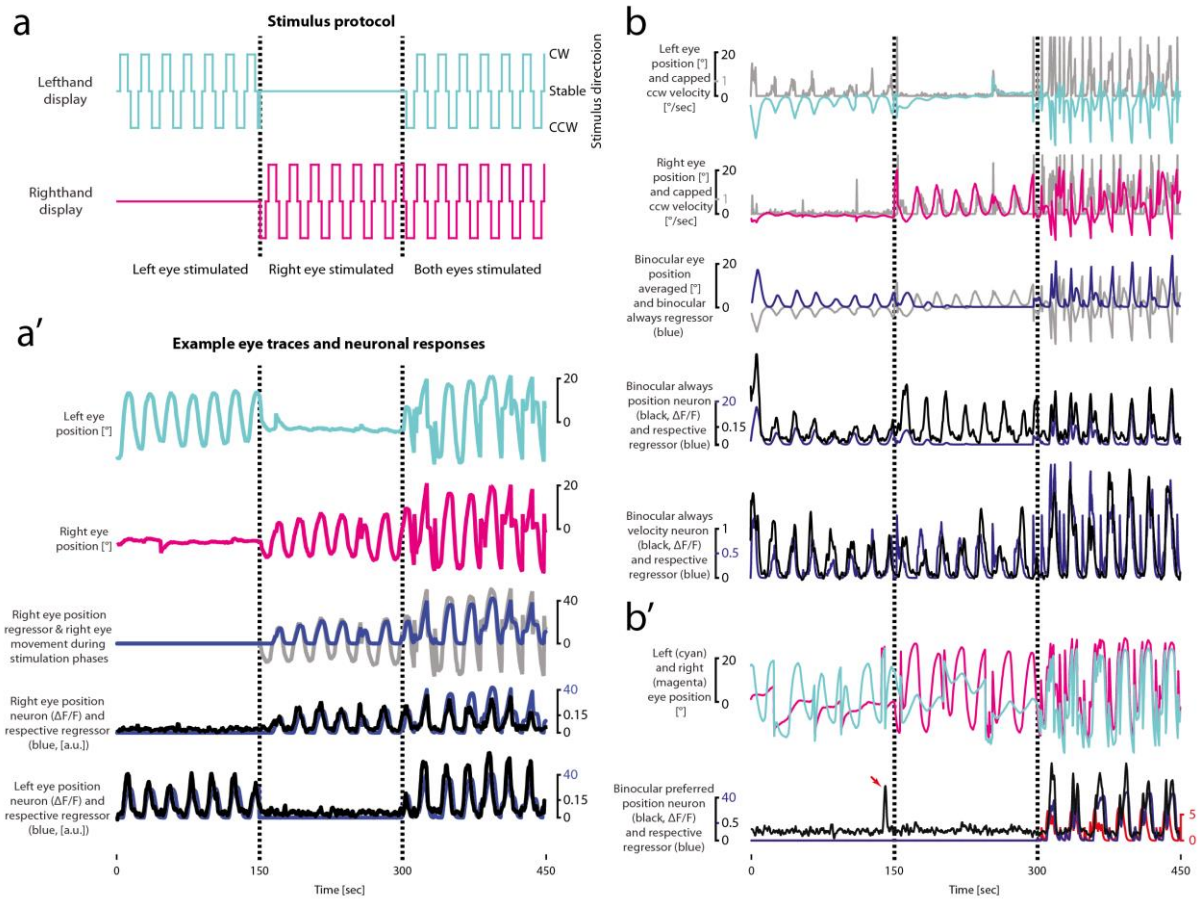

1085

1086

1087

1088

1089

1090

1091

1092

1093 Figure 2: Experimental strategy to assess binocular coordination

1094 **a:** Stimulus protocol for data shown in a'. Lines indicate direction in which the stimulus is  
1095 moving. Dashed lines separate stimulus phases. **a':** Example eye traces (right eye: magenta,  
1096 left eye: cyan) and corresponding neuronal calcium responses (black,  $\Delta F/F$ ) with monocular  
1097 coding. The respective highest scoring regressor [Monocular right eye, rightward eye position  
1098 (r3); monocular left eye, rightward eye position (r7)] is shown in blue. The grey line shows  
1099 right eye position from which r3 was derived. **b:** Example calcium responses of binocular  
1100 neurons. Left (cyan) and right (magenta) eye traces with capped counter-clockwise eye  
1101 velocity (grey, upper two plots) and averaged eye position (grey, third plot from the top) of  
1102 which regressors r14 (binocular always leftward velocity) and r18 (binocular always leftward  
1103 position) were derived. Black lines show  $\Delta F/F$  for a binocular always (BA) position (P) and a  
1104 BA velocity (V) neuron with the corresponding highest scoring regressor in blue. Note that the  
1105 eye position for the right eye was mostly shifted towards the right side which resulted in  
1106 almost no activity for R18 in the middle phase, although the regressor still classified the  
1107 neurons correctly. **b':** Example binocular preferred (BP) position neuron with respective eye  
1108 trace; note the binocular event during the left eye stimulation and the corresponding activity  
1109 (red arrow). The blue trace shows the respective regressor (binocular preferred, rightward  
1110 position, r1), the red trace the corresponding velocity regressor (binocular preferred,  
1111 rightward velocity, r9).

1112

1113

1114

1115 **Figure 3: Monocular and binocular cell maps**

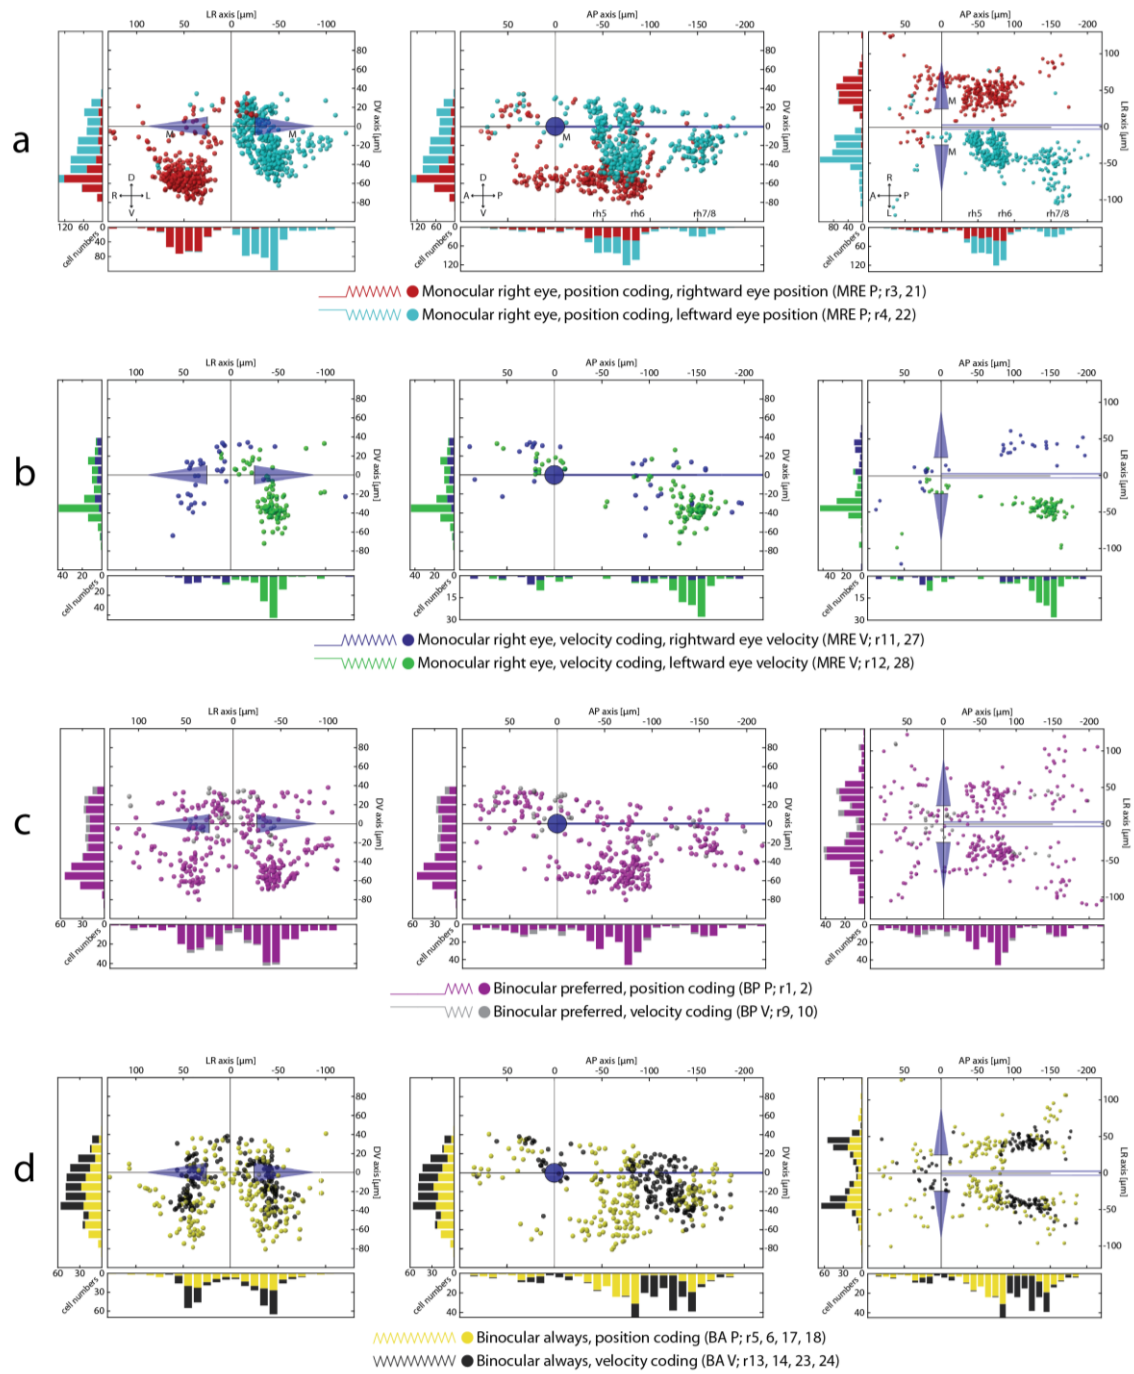

1116

1117

1118

1119

1120

1121 Figure 3: Monocular and binocular cell maps

1122 **a-d:** Transversal, sagittal and dorsal views for MRE and binocular neurons in the hindbrain  
1123 (see Suppl. Fig. 3a-b for mirror-symmetric MLE neurons). A: anterior; BA: binocular always;  
1124 BP: binocular preferred; D: dorsal; L: left; M: Mauthner cells; MRE: monocular right eye; P:  
1125 position/posterior; R: right; r: regressor; rh 5-8: rhombomeres 5-8; V: ventral/velocity; each  
1126 coloured ball represents one neuron identified in one fish.

1127

1128

1129 **Figure 4: Monocular/binocular synopsis**

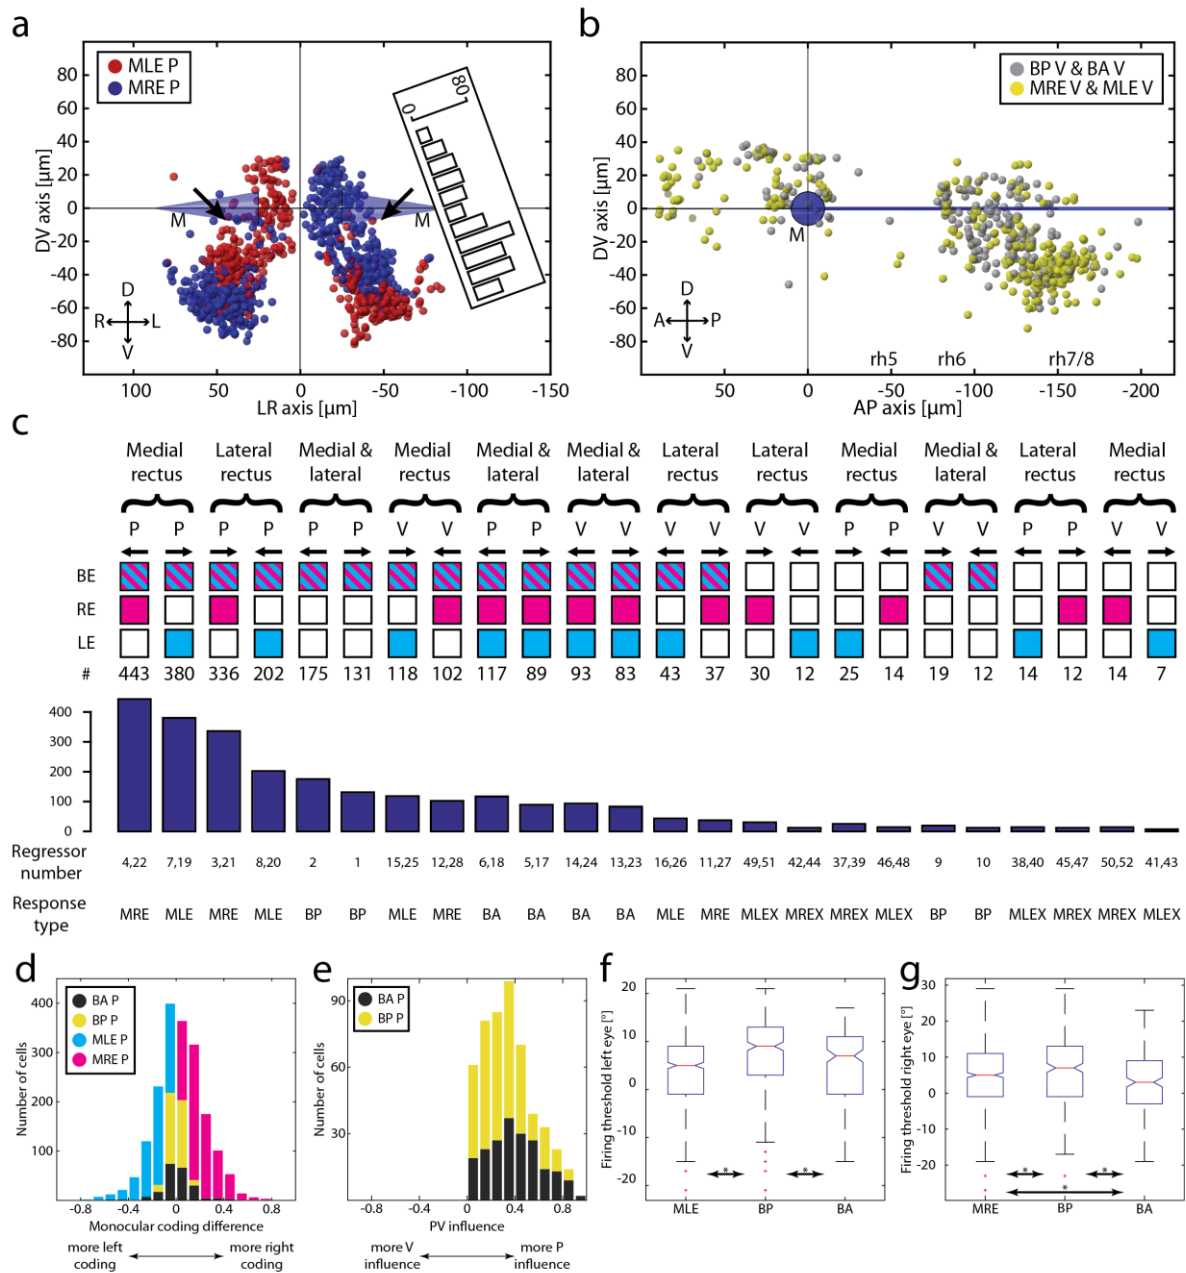

1130

1131

1132

1133

1134

1135

1136 Figure 4: Monocular/binocular synopsis

1137 **a:** Transversal projection of monocular coding neurons within rh5/6 (ABN). D: dorsal; L: left;  
1138 M: Mauthner cells; MLE: monocular left eye; MRE: monocular right eye; P: position; R: right;  
1139 V: ventral. Black arrows indicate position of a faint gap between the ventral and dorsal  
1140 neurons. Inset shows the numbers of neurons for the left hemisphere along the D-V axis  
1141 rotated by 20°. **b:** Monocular and binocular velocity encoding neurons. A: anterior; BA:  
1142 binocular always; BP: binocular preferred; P: posterior; rh 5-8: rhombomere 5-8; **c:** Number  
1143 of neurons found for each response type sorted pairwise according to the affected muscle(s).  
1144 BA: binocular always; BP: binocular preferred; MLE: monocular left eye; MLEX: monocular left  
1145 eye exclusive; MRE: monocular right eye; MREX: monocular right eye exclusive P: position; V:  
1146 velocity; **d:** Monocular coding differences for all four main response types for position coding  
1147 neurons. Index running from -1 (exclusively coding for left eye) to +1 (right eye); **e:** PV  
1148 influence for BA P and BP P neurons. Index running from -1 (exclusive velocity influence) to  
1149 +1 (exclusive position influence); **f-g:** Left and right eye firing thresholds acquired during the  
1150 firing threshold analysis pooled in ON direction.

1151

1152

1153

1154

1155

1156

1157

1158 **Figure 5: Neuronal tuning for eye velocity and position**

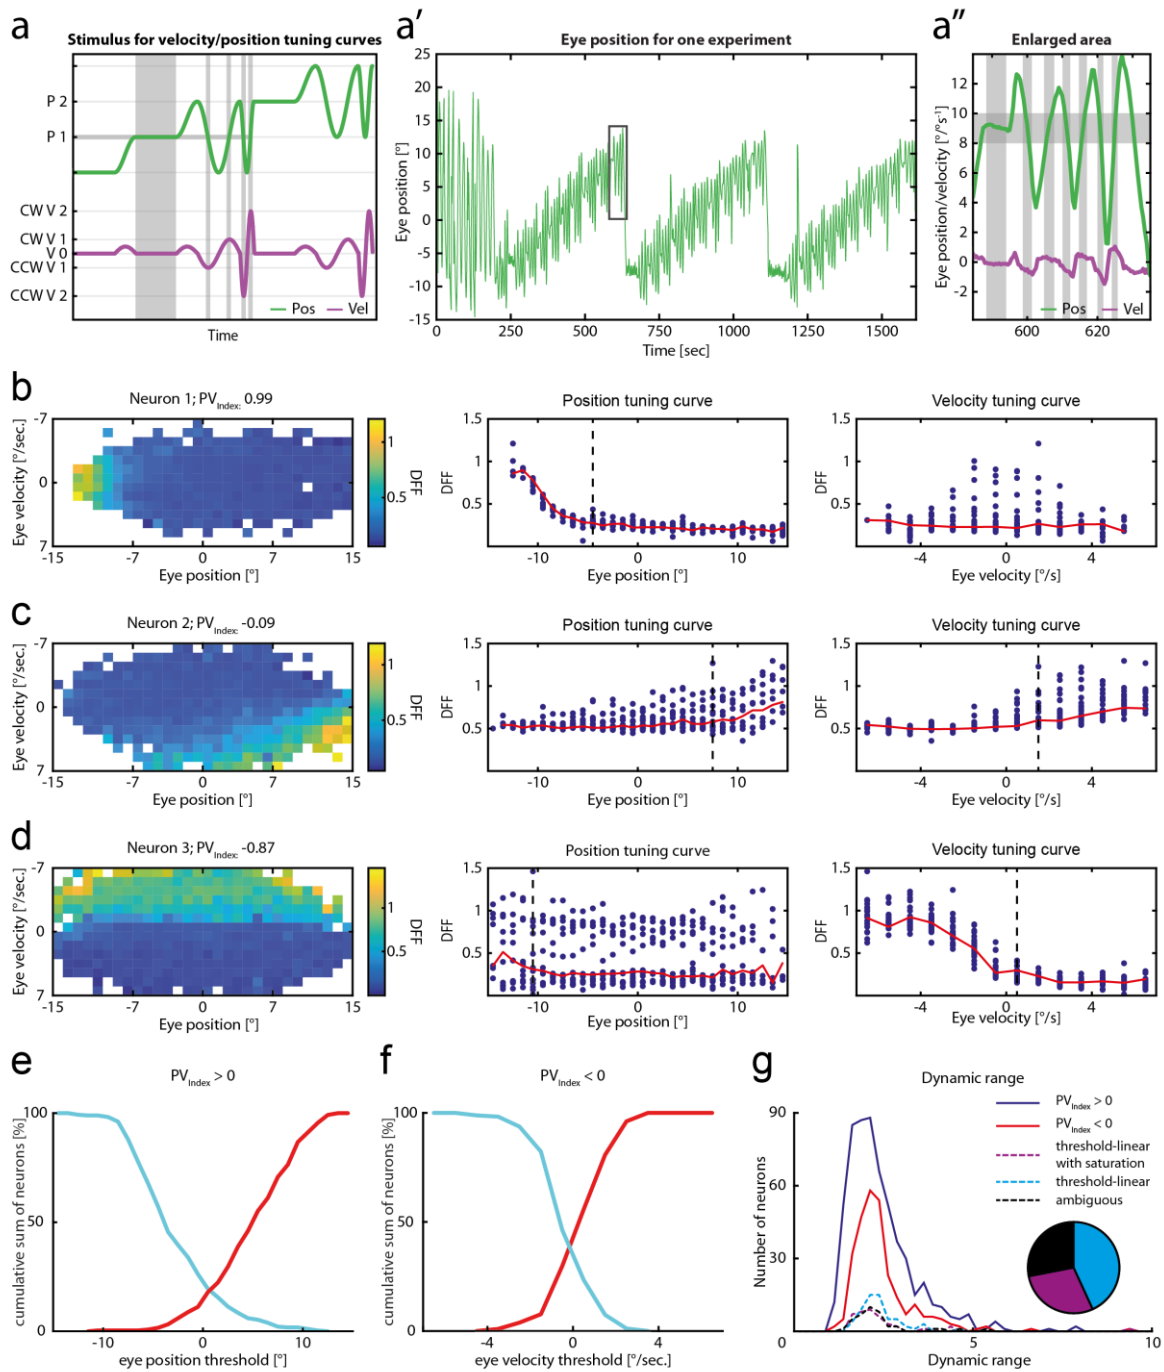

1159

1160

1161

1162

1163



1164 Figure 5: Neuronal tuning for eye velocity and position

1165 **a:** Schematic of the closed loop velocity/position stimulus for highlighted eye position (P1) at  
1166 different slow-phase eye velocities (CCW V2, CCW V1, V0, CW V1, CW V2). Only two velocity  
1167 steps are depicted for illustration purposes. Grey shaded rectangles show one eye position  
1168 bin and different velocities for that bin. CCW: counter-clockwise; CW: clockwise; P: position;  
1169 V: velocity **a'**: Example binocular eye trace for one recording. **a''**: Highlighted area from **a'**.  
1170 Grey boxes as in **a**. **b-d:** Left panel: Tuning curves showing DFF colour coded for averaged eye  
1171 position-velocity bins. Middle panel: Position tuning curve. Red line shows averaged DFF  
1172 between  $\pm 0.5^\circ/\text{sec}$  eye velocity, blue dots for every other eye velocity bin (as in left panel).  
1173 A black dashed line shows the firing threshold, if identified. Right panel: same as for the  
1174 middle panel, but for eye velocity. Red line shows averaged DFF between  $\pm 2^\circ$  eye position. **e:**  
1175 Cumulative position threshold plot for position coding neurons ( $PV_{\text{Index}} > 0$ ) pooled in ON  
1176 direction to the right (red, n=250) and left (cyan, n=283). **f:** Cumulative velocity threshold plot  
1177 for velocity coding neurons ( $PV_{\text{Index}} < 0$ ) pooled in ON direction to the right (red, n=104) and  
1178 left (cyan, n=175). **g:** Dynamic range of fluorescence for position and velocity coding neurons  
1179 ( $PV_{\text{Index}} > 0$ ,  $PV_{\text{Index}} < 0$  respectively) and for neuron with a very strong velocity coding ( $PV_{\text{Index}}$   
1180  $< -0.5$ , dashed lines) separated by their response profile. Pie chart showing the relative  
1181 numbers for strong velocity coding neurons (w/ saturation: 29 % (40/139), w/o saturation:  
1182 43% (60/139), ambiguous: 28 % (39/139)).

1183

1184

1185

1186

1187

1188 **Figure 6:  $PV_{Index}$  distribution and spatial location of identified neurons**

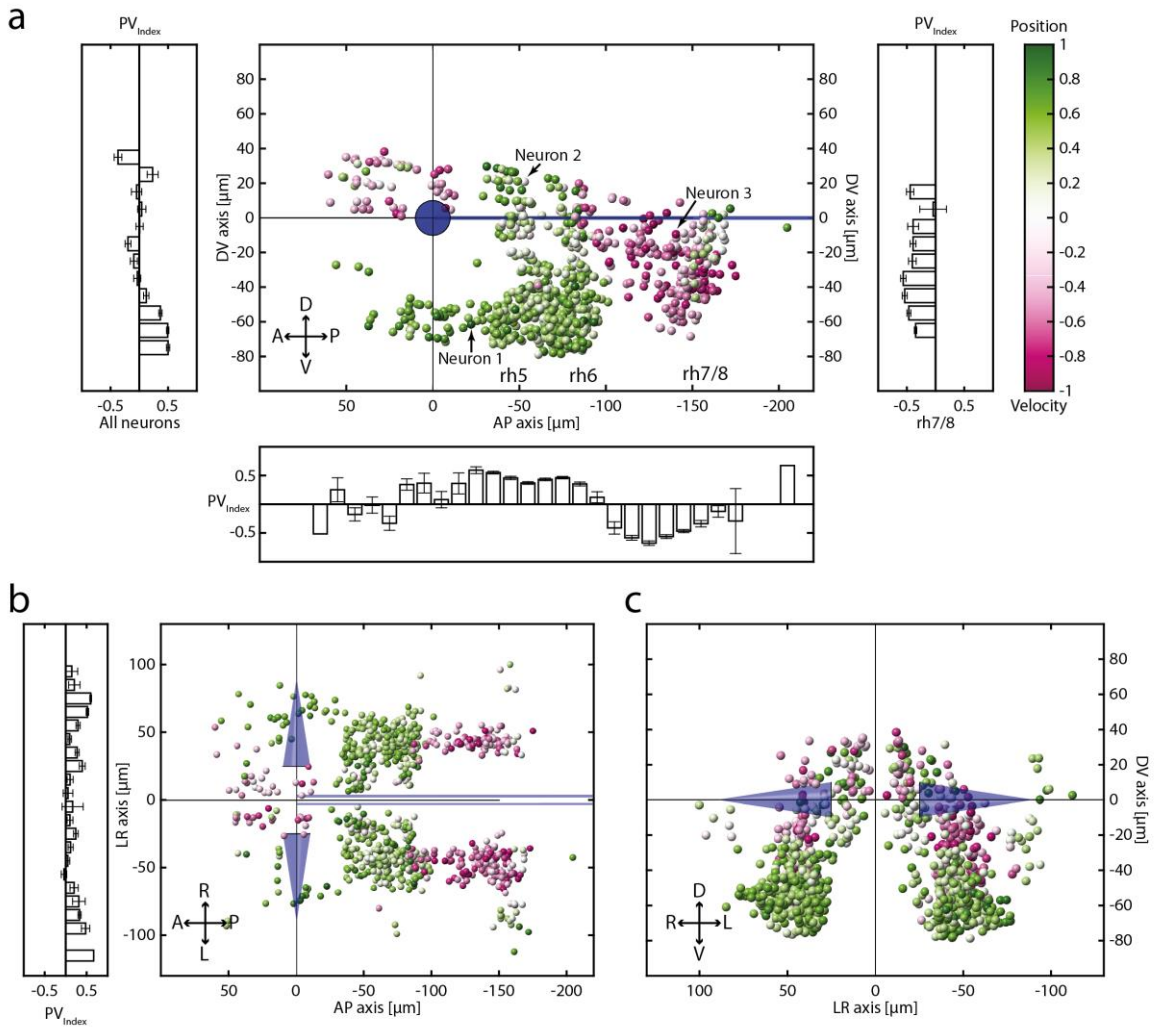

1189

1190

1191

1192

1193

1194

1195

1196

1197

1198 Figure 6: PV<sub>Index</sub> distribution and spatial location of identified neurons

1199 **a-c:** Sagittal (a), dorsal (b) and transversal (e) anatomical views of eye-correlated neurons  
1200 color-coded for the PV<sub>Index</sub>. Histograms show the anatomical distribution of neurons along the  
1201 appropriate axis for either all neurons or exclusively for rh7/8. Blue cones: Mauthner cells,  
1202 blue line: MLF; A: anterior, D: dorsal; P: posterior; V: ventral; Error bars are SEM.

1203

1204

1205

1206

1207

1208

1209

1210

1211

1212

1213

1214

1215

1216 Figure 7: Summary for binocular coordination and PV encoding in the larval zebrafish

1217 hindbrain

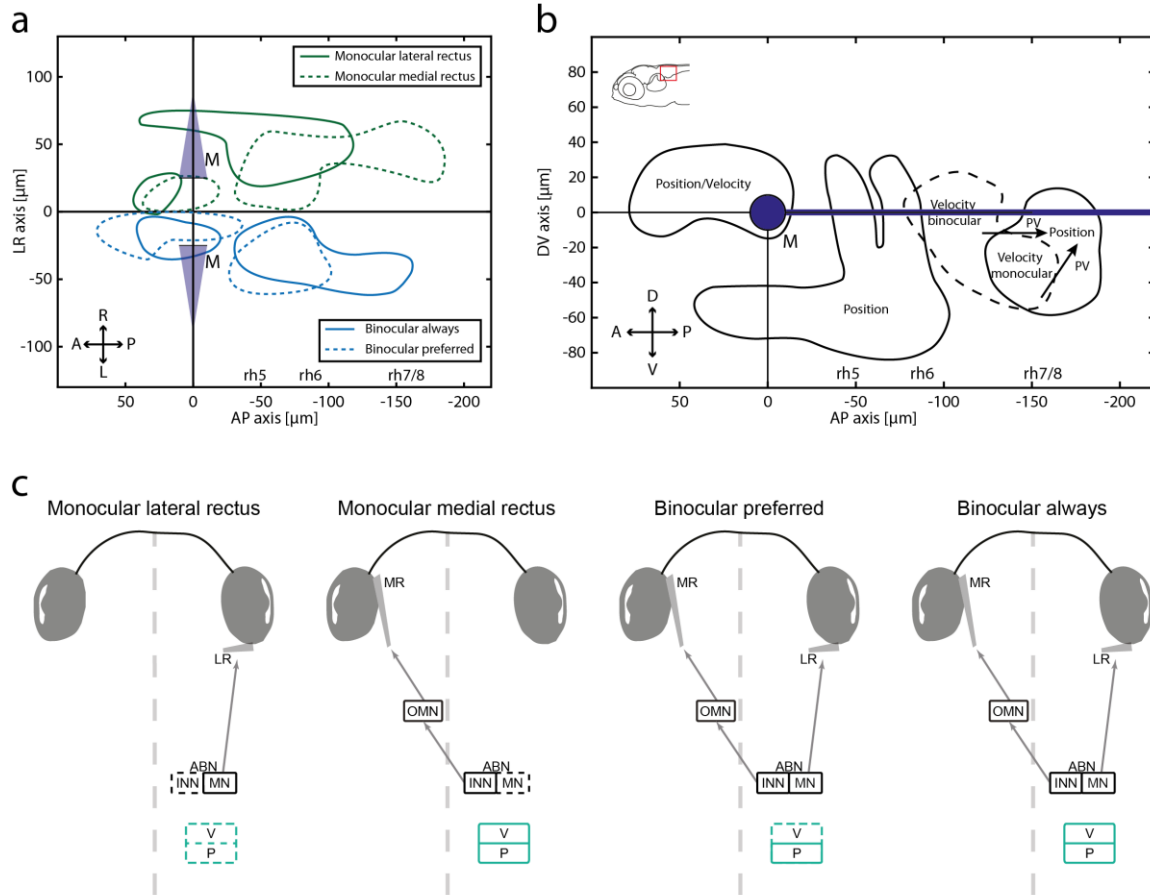

1218

1219

1220

1221

1222

1223

1224

1225

1226 Figure 7: Summary for binocular coordination and PV encoding in the larval zebrafish

1227 hindbrain

1228 **a:** Anatomical separation of monocular and binocular neurons in the dorsal view. For  
1229 illustrative purposes, all monocular domains are depicted in the right hemisphere, and  
1230 binocular domains in the left hemisphere (no difference across hemispheres was identified).  
1231 A: anterior; L: left; M: Mauthner cells; P: posterior; R: right; rh5-8: rhombomere 5-8. **b:**  
1232 Distinct clusters of eye movement coding neurons in the hindbrain (side view). Arrows  
1233 indicating position-velocity shift in the OI. D: dorsal; V: ventral. **c:** Schematic illustrating each  
1234 response type. Note the absence of slow-phase velocity neurons with preferred binocular (BP)  
1235 encoding and the lack of monocular neurons for the temporal half of the ipsilateral eye  
1236 outside of the nucleus abducens. Dashed lines represent “missing” neuronal clusters, i.e. only  
1237 a small numbers of neurons were found for the respective eye movements.

1238

1239

1240

1241

1242

1243

1244

1245

1246

1247

1248

1249

1250

1251

1252

1253

1254

1255

1256

1257

1258

1259

1260

1261

1262

1263

1264

1265

## 1266 **Supplemental information**

1267

1268 Relating to the manuscript “Recruitment orders underlying binocular coordination of eye  
1269 position and velocity in the larval zebrafish hindbrain” by

1270

1271 Christian Brysch, Claire Leyden and Aristides B. Arrenberg

1272

1273

1274 Contains:

1275 • Supplemental material and methods (3 equations)

1276 • Chemicals and Solutions (1 table)

1277 • Supplemental figures (7)

1278

1279

1280

1281

1282

1283

1284

1285

1286 **Supplemental Material & Methods:**

1287 Exclusion of recordings with too much yoking:

1288 For each eye the velocity was calculated as the difference of eye position at successive time  
1289 points. The eye velocity was capped at 8 degrees/sec – to prevent artefacts from saccades –  
1290 and smoothed (Eq. 1). We calculated a “yoking index” (YI) according to the following equation  
1291 using sums across time series data points from a given recording:

1292

$$YI = \frac{\sum abs(Velocity_{ON}) - \sum abs(Velocity_{OFF})}{\sum abs(Velocity_{ON}) + \sum abs(Velocity_{OFF})} \quad (3)$$

1293

1294 The YI was calculated for each monocular phase and only recordings where both values were  
1295 bigger than 0.5 were used in the analysis. The “ON” eye was defined as the stimulated eye  
1296 (Supplemental Fig. 1b).

1297

1298 Monocular coding differences (binocular coordination experiment):

1299 For each major group of position coding neurons the correlation coefficient of the highest  
1300 scoring left and right eye monocular regressor was chosen and the difference in monocular  
1301 coding was calculated in the following way:

$$Monocular\ coding\ difference = \frac{Corr_{left} - Corr_{right}}{Corr_{left} + Corr_{right}} \quad (4)$$

1302

1303 PV influence:

1304 For each BA and BP coding neuron the velocity influence was calculated by choosing the  
1305 correlation coefficient of the appropriate velocity regressor depending on the highest scoring



1306 regressor used to identify this neuron (i.e. if the highest scoring regressor was r2 it would be  
1307 compared to r10) according to:

$$PV_{Influence} = \frac{Corr_{pos} - Corr_{vel}}{Corr_{pos} + Corr_{vel}} \quad (5)$$

1308 If the appropriate velocity coefficient was negative, it was set to 0.

1309

1310

1311 **Chemicals and solutions:**

1312 Table 2: Chemicals

| Chemical       | Supplier:            |
|----------------|----------------------|
| NaCl           | AppliChem, A3597     |
| KCl            | Carl Roth, 6781.1    |
| CaCl           | AppliChem, A1873     |
| MgSO4          | Merck, 1.05886.05000 |
| Methylene blue | AppliChem, A4084     |
| Agarose        | Biozym, 850080       |

1313

1314 E3: NaCl (5 mM), KCl (0.17 mM), CaCl (0.33 mM), MgSO<sub>4</sub> (0.33 mM) with 0.01 % methylene  
1315 blue.

1316

1317 **Supplemental Figures:**

1318 **Supp. Figure 1: Methods for monocular/binocular analysis**

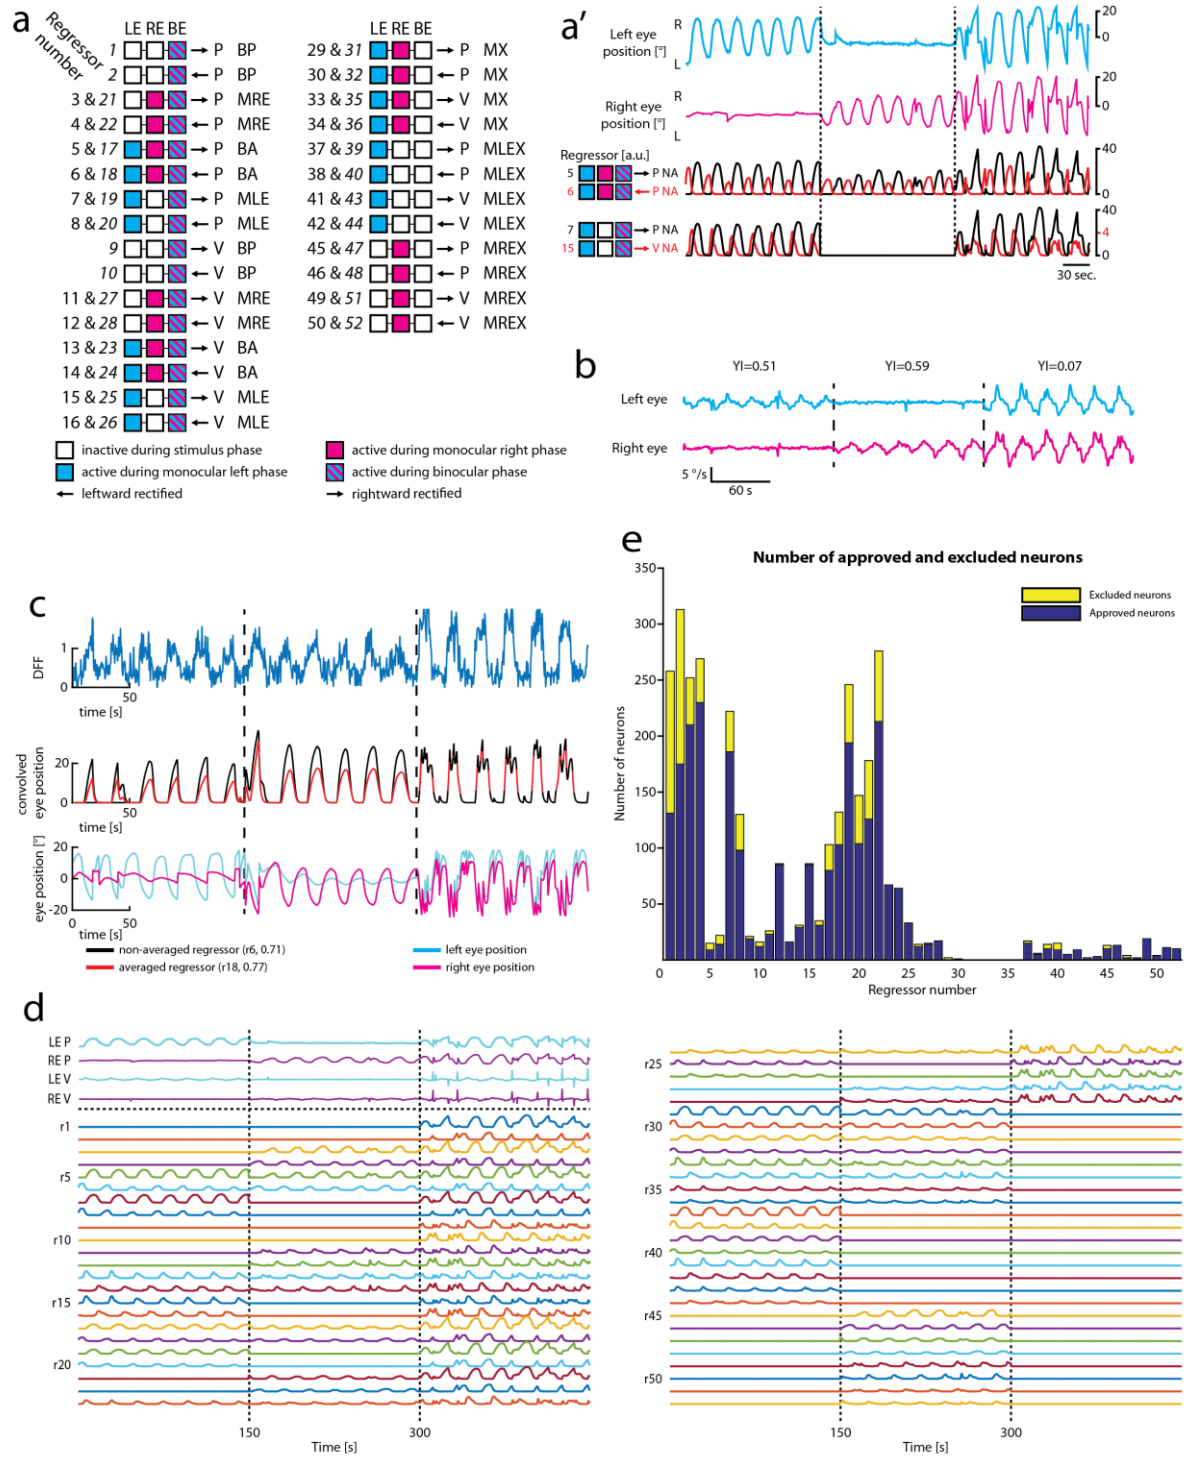

1319

1320

1321 Supp. Figure 1: Methods for monocular/binocular analysis

1322 **a:** Overview of regressors used to classify response types. Each set of three squares  
1323 (connected by a black line) corresponds to one (or two) types of regressors, see colour legend.  
1324 Regressors with italic numbers correspond to averaged regressors; BA: binocular always; BE:  
1325 both eyes; BP: binocular preferred; LE: left eye; MX: monocular exclusive; MLE: monocular  
1326 left eye; MLEX: monocular left eye exclusive; MRE: monocular right eye; MREX: monocular  
1327 right eye exclusive; P: position; RE: right eye; V: velocity; **a'**: Example regressors and  
1328 respective eye traces. NA: non-averaged (see Methods); P: position; V: velocity; eye traces  
1329 same as in figure 1c-c'; **b:** Example eye traces for yoking index exclusion. YI: yoking index; **c:**  
1330 Example binocular always (BA) neuron and the highest scoring regressor r6 (non-averaged)  
1331 with the corresponding averaged regressor (r18) and eye traces they are based upon. **d:** All  
1332 derived regressors from recording shown in figure 1c-c'. LE: left eye; P: position; RE: right eye;  
1333 V: velocity; r: regressor. **e:** Overview of all approved and excluded neurons for each regressor  
1334 based on the firing threshold analysis.

1335

1336

1337

1338

1339

1340

1341

1342 **Supp. Figure 2: Firing threshold analysis**

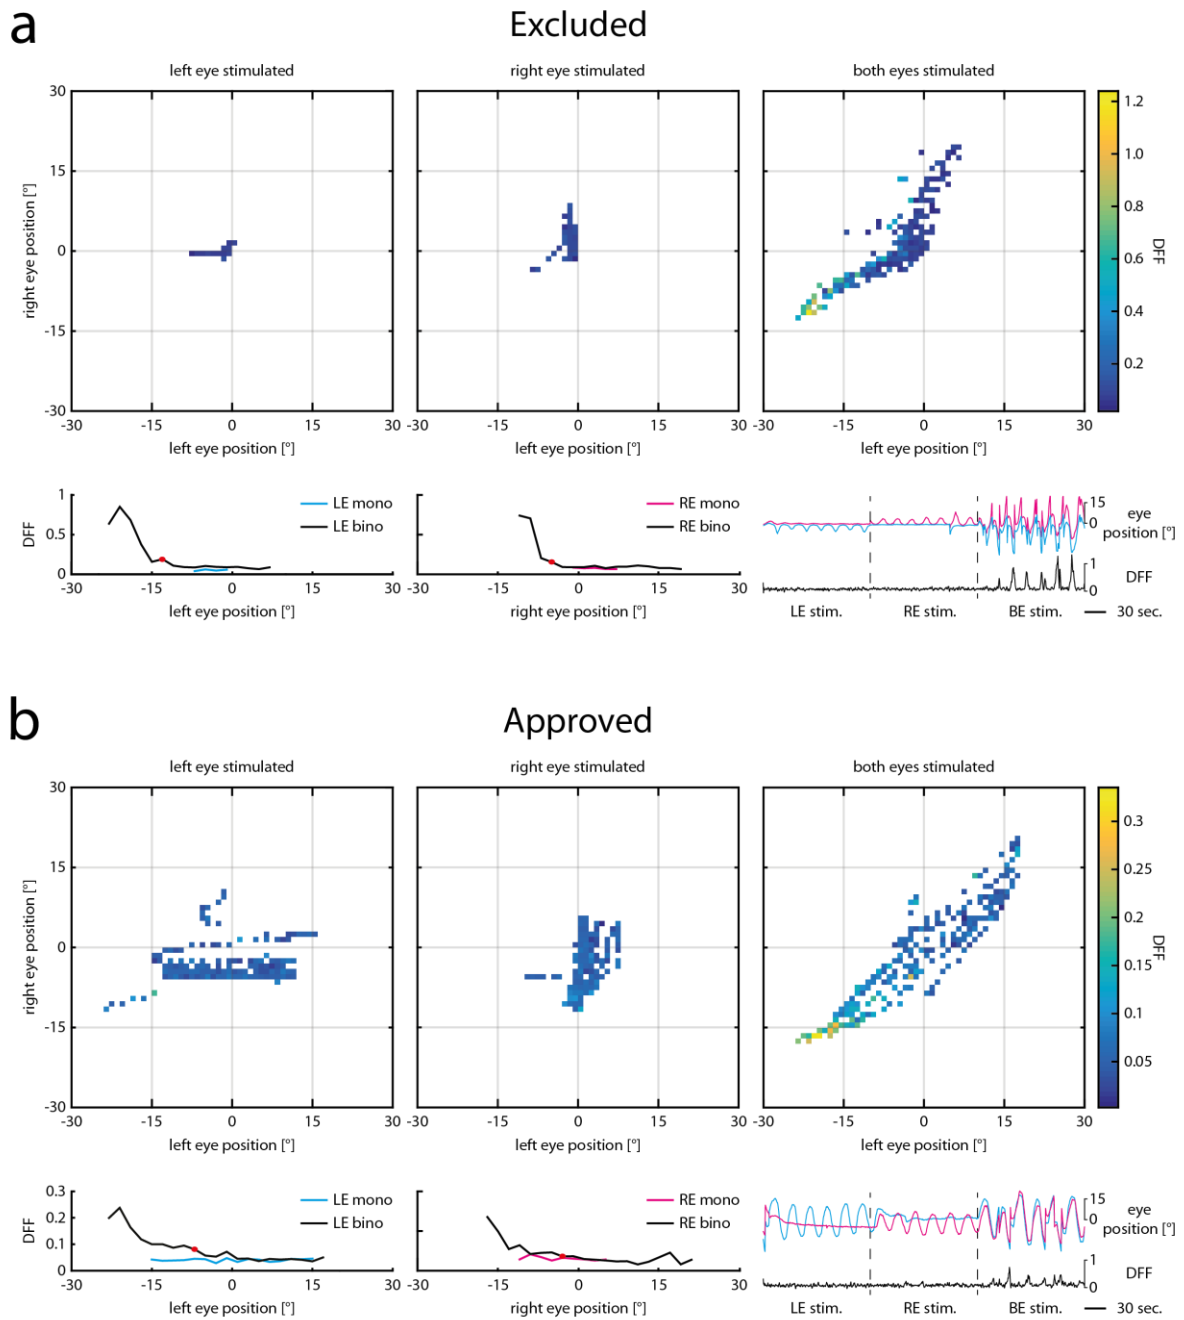

1343

1344

1345

1346

1347

1348 Supp. Figure 2: Firing threshold analysis

1349 Tuning curves during the monocular and binocular stimulus phases for one neuron excluded  
1350 from further analysis (a) and one neuron included in further analysis (b). **a:** The upper row  
1351 shows the neural activity ( $\Delta F/F$ ) colour coded during the monocular left eye (left plot), right  
1352 eye (middle plot) and binocular (right plot) stimulus phases for individual eye position bins.  
1353 Monocular tuning curves (cyan left eye, magenta right eye) were plotted for the respective  
1354 monocular stimulus phase and the binocular stimulus phase (black). Only bins with at least  
1355 three individual data points were used. Red dot shows firing threshold. For this neuron, the  
1356 eye position never explored the eye position threshold during the monocular stimulus phases,  
1357 it was thus excluded from further analysis. In the lower right the corresponding eye positions  
1358 and neural activity ( $\Delta F/F$ ) are plotted versus time. **b:** Tuning curves and eye positions for one  
1359 threshold approved neuron. Note that for this neuron, the monocular tuning curves covered  
1360 the eye position threshold (red dot).

1361

1362

1363

1364

1365

1366

1367

1368

1369 **Supp. Figure 3: Additional monocular/binocular cell maps**

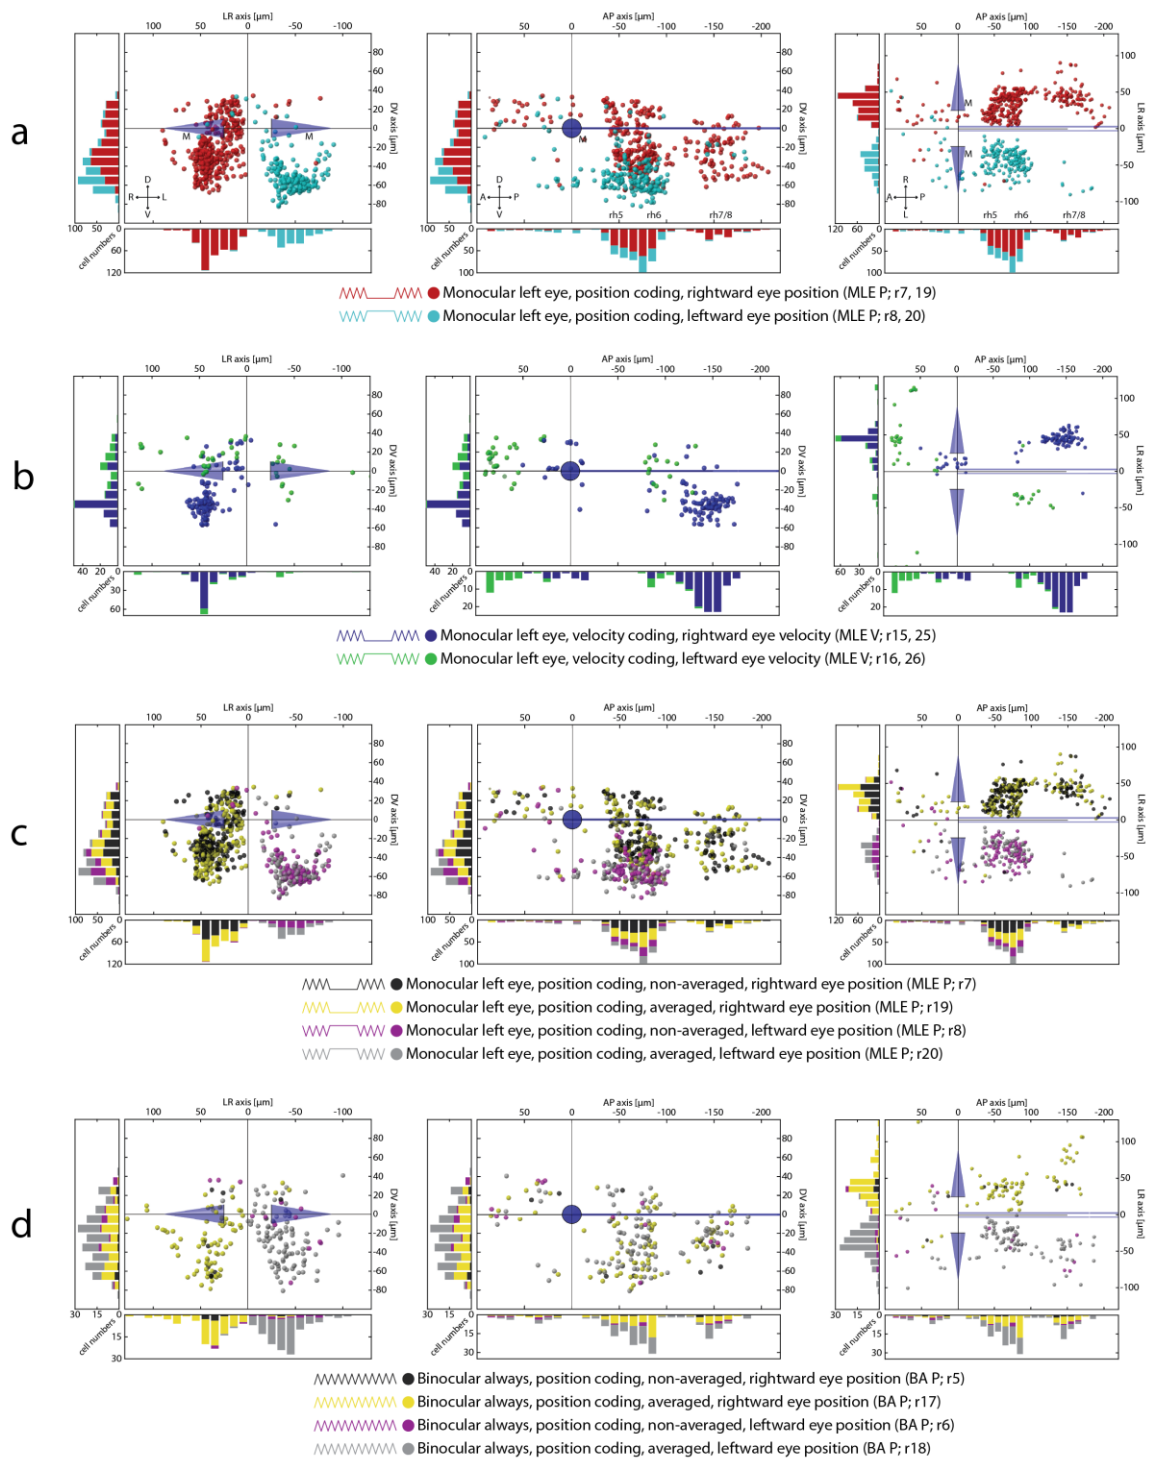

1370

1371

1372

1373 Supp. Figure 3: Additional monocular/binocular cell maps

1374 **a-d:** Transversal, sagittal and dorsal views for MLE and BA neurons in the hindbrain. A:  
1375 anterior; BA: binocular always; D: dorsal; L: left; M: Mauthner cells; MLE: monocular left eye;  
1376 P: position/posterior; R: right; r: regressor; rh 5-8: rhombomeres 5-8; V: ventral/velocity;

1377

1378

1379

1380

1381

1382

1383

1384

1385

1386

1387

1388

1389

1390

1391

1392 **Supp. Figure 4: Cell maps for monocular exclusive neurons**

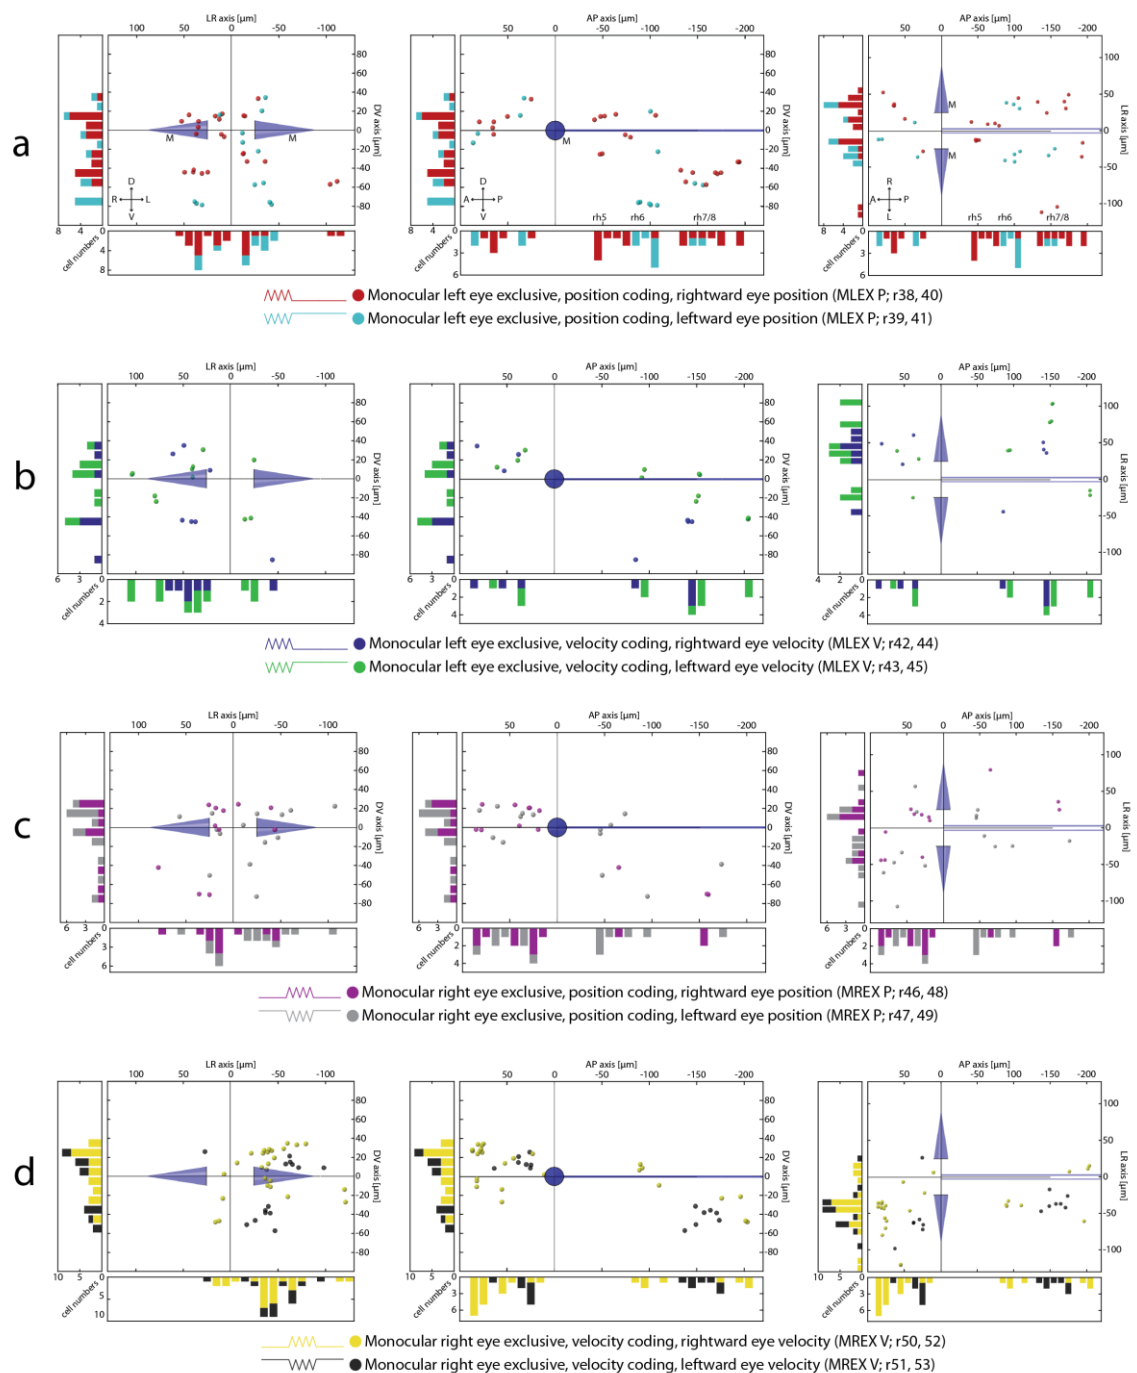

1393

1394

1395

1396

1397



1398 Supp. Figure 4: Cell maps for monocular exclusive neurons

1399 **a-d:** Transversal, sagittal and dorsal views for MLEX and MREX neurons. A: anterior; D: dorsal;  
1400 L: left; M: Mauthner cells; MLEX: monocular left eye exclusive; MREX: monocular right eye  
1401 exclusive; P: position/posterior; R: right; r: regressor; rh 5-8: rhombomeres 5-8; V:  
1402 ventral/velocity;

1403

1404

1405

1406

1407

1408

1409

1410

1411

1412

1413

1414

1415

1416

1417 **Supp. Figure 5: Additional tuning curves and threshold analysis**

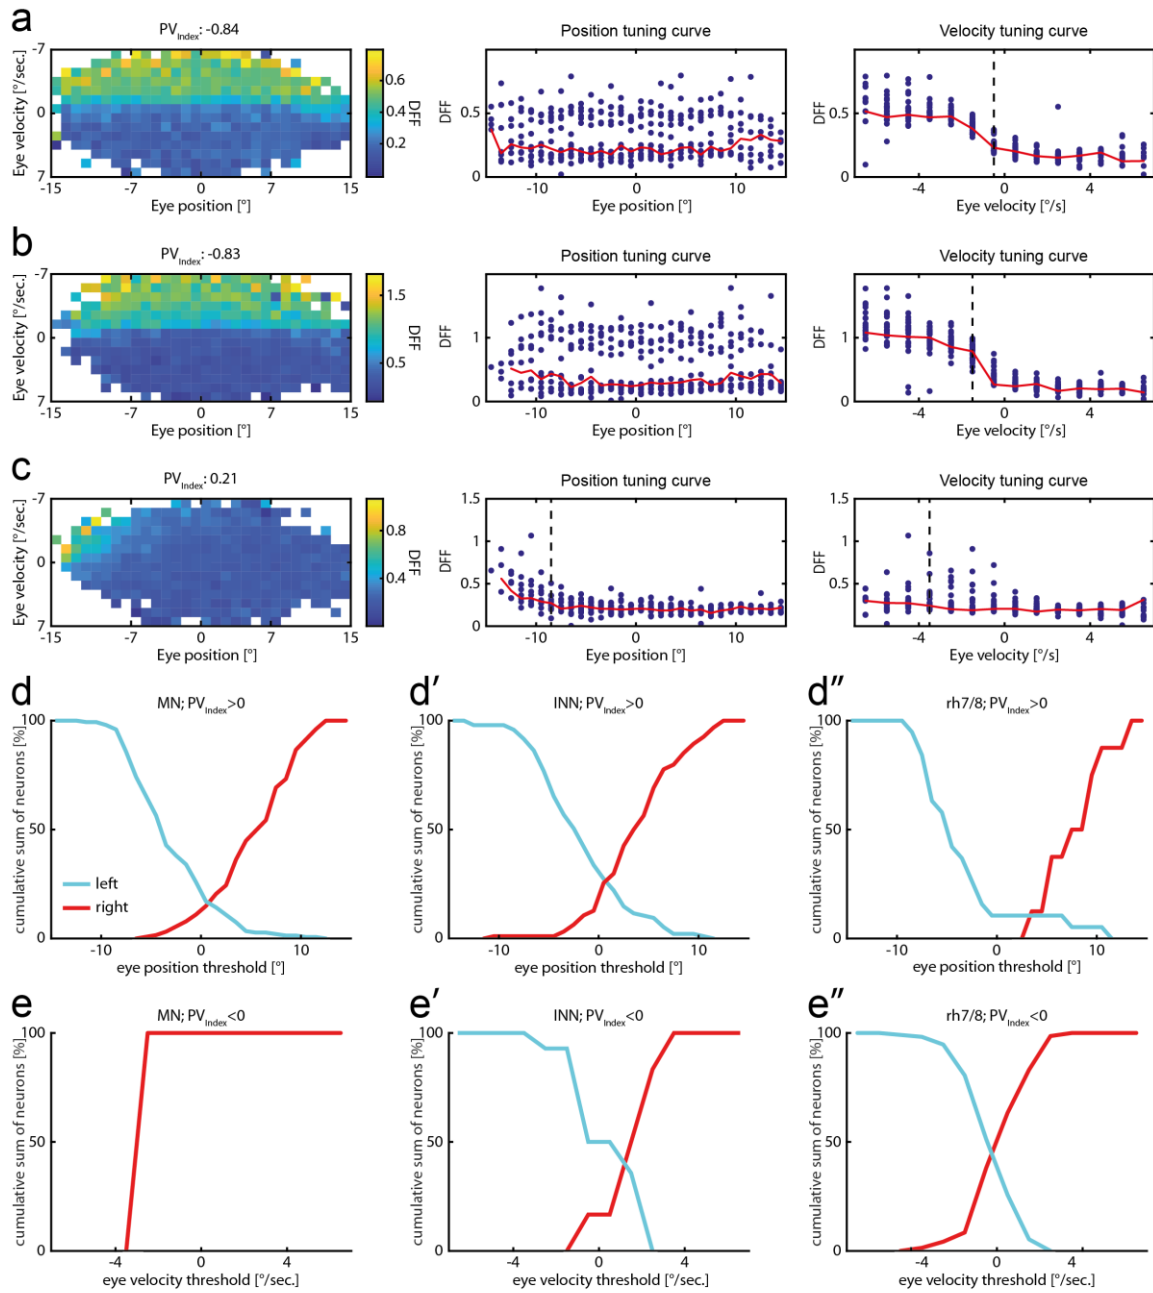

1418

1419

1420

1421

1422

1423

1424 Supp. Figure 5: Additional tuning curves and threshold analysis

1425 Additional tuning curves and firing thresholds for different neuron populations. **a-c:**  
1426 Additional tuning curve plot same as in Fig. 4. **d-d''**: Cumulative position threshold plots for  
1427 position coding neurons ( $PV_{\text{Index}} > 0$ ) pooled in ON for motoneurons (d, left: 147, right: 127),  
1428 internuclear neurons (d', left: 95, right: 94, both based on their anatomical location) and the  
1429 caudal hindbrain (d'', left: 19, right: 8). **e-e''**: Cumulative velocity threshold plots for velocity  
1430 coding neurons ( $PV_{\text{Index}} < 0$ ) pooled in ON for motoneurons (e, left: 0, right: 1), internuclear  
1431 neurons (e': left: 14, right: 6) and the caudal hindbrain (e'': left: 113, right: 71).

1432

1433

1434

1435

1436

1437

1438

1439

1440

1441

1442

1443

1444 Supp. Figure 6: Different response profiles for velocity neurons

a

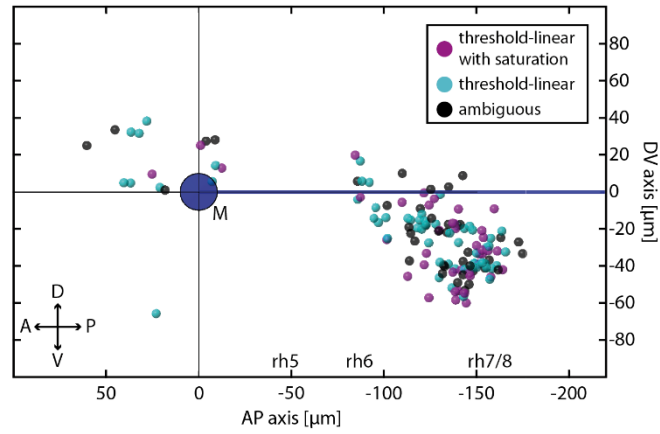

b

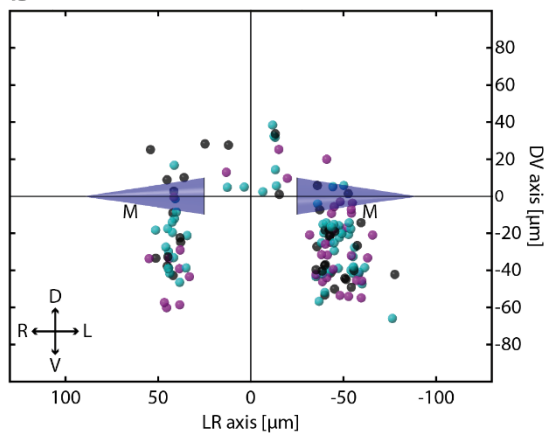

c

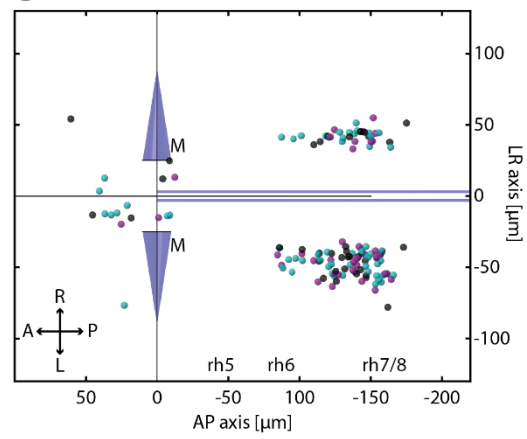

1445

1446

1447

1448

1449

1450

1451

1452

1453

1454 Supp. Figure 6: Different response profiles for velocity neurons

1455 Velocity neurons with different response profiles show no spatial clustering. **a-c:** Sagittal,  
1456 transversal and dorsal view of threshold-linear (n=60), threshold-linear with saturation (n=40)  
1457 and ambiguous (n=39) neurons ( $PV_{\text{Index}} < -0.5$ ) color-coded according to their response type.  
1458 A: anterior; D: dorsal; L: left; M: Mauthner cells P: posterior; R: right; rh5-8: rhombomeres 5-  
1459 8; V: ventral.

1460

1461

1462

1463

1464

1465

1466

1467

1468

1469

1470

1471

1472

1473 **Supp. Figure 7: Position and velocity thresholds**

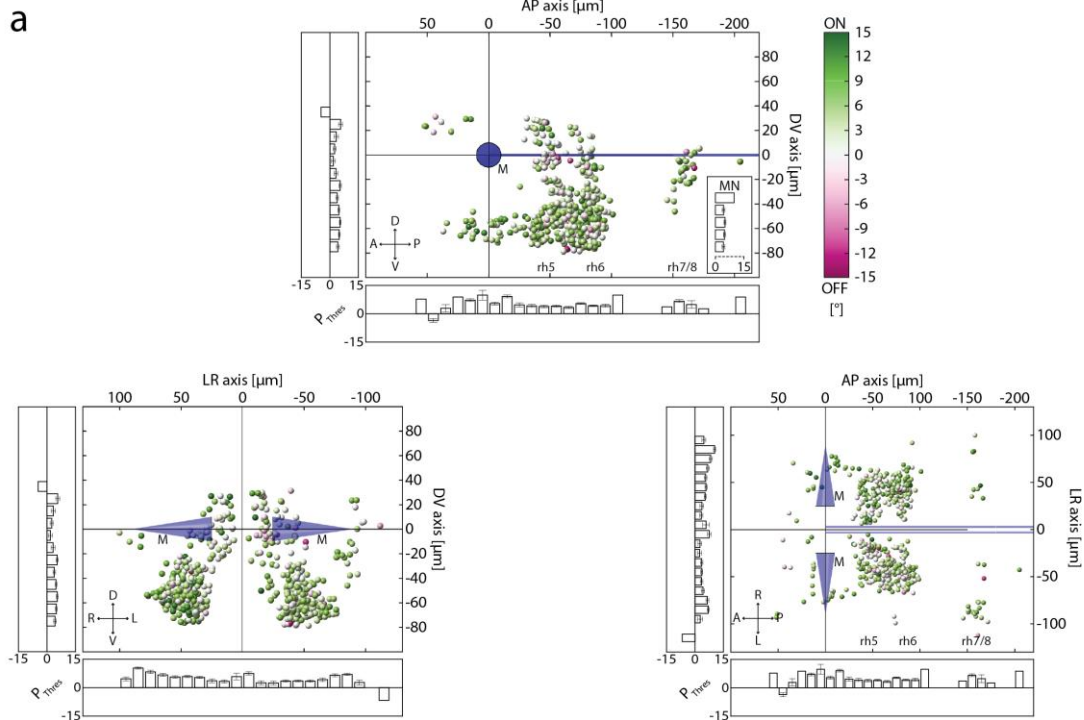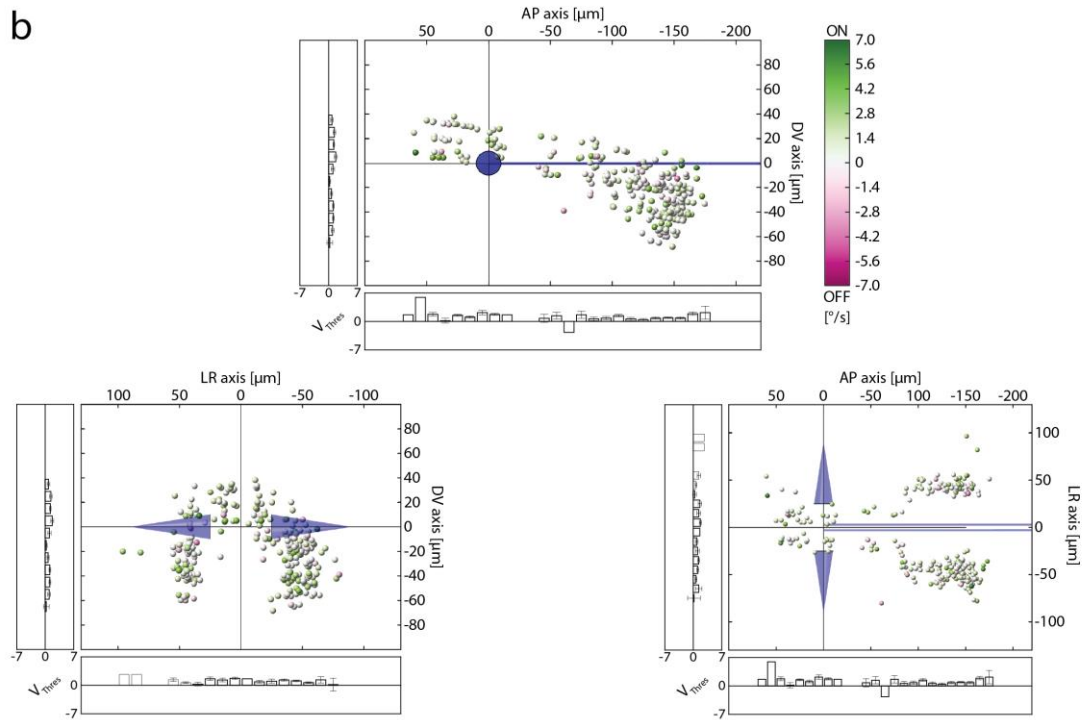

1474

1475 Supp. Figure 7: Position and velocity thresholds

1476 Transversal, sagittal and dorsal views of position and velocity coding neurons colour-coded  
1477 for their thresholds. **a:** Position thresholds ( $P_{\text{Thres}}$ ) colour-coded for all position coding neurons  
1478 ( $PV_{\text{Index}} > 0$ ) with an identified firing threshold pooled in ON direction (n=533). Inset shows  
1479 thresholds for motoneurons based on their anatomical location (no statistical significance was  
1480 observed: Kruskal-Wallis  $p=0.22$ ; n=2, 41, 98, 89, 43) **b:** Velocity threshold ( $V_{\text{Thres}}$ ) colour-  
1481 coded for all velocity coding neurons ( $PV_{\text{Index}} < 0$ ) with an identified firing threshold pooled in  
1482 ON direction (n=279).
